# Supplementary material for: Electrocorticography is superior to subthalamic local field potentials for movement decoding in Parkinson’s disease
Source: eLife. 2022 May 27;11:e75126. doi: 10.7554/eLife.75126 (PMC9142148; doi:10.7554/eLife.75126)
Supplement: Figure 1—source data 1. [file elife-75126-fig1-data1.csv]

	ch	dist_con	dist_ips	loc	r2_con	r2_ips	sess_	sub	x	y	z	b_peak	UPDRS_rigidity_upper_extrimity_contralateral	UPDRS_rigidity_upper_extrimity_ipsilateral	UPDRS_combined_akinesia_rigidty_contalateral	UPDRS_combined_akinesia_rigidty_ipsilateral	UPDRS_total
0	ECOG_RIGHT_0	23.71475573	23.71475573	ECOG	0.65806003	0.418973615	right	0	37.318174	-48.61012664	61.79765474	3.004268608	1	1	6	7	28
1	ECOG_RIGHT_1	12.71865663	12.71865663	ECOG	0.71173448	0.415419074	right	0	40.1598943	-37.31592983	64.31171618	4.356077005	1	1	6	7	28
2	ECOG_RIGHT_2	4.524948566	4.524948566	ECOG	0.549020863	0.308201766	right	0	40.94303578	-27.21778456	64.09518408	3.654367129	1	1	6	7	28
3	ECOG_RIGHT_3	8.466678717	8.466678717	ECOG	0.623976546	0.375704707	right	0	39.78395522	-17.00523081	63.86618136	3.849307726	1	1	6	7	28
4	ECOG_RIGHT_4	19.79278943	19.79278943	ECOG	0.571969597	0.246979024	right	0	39.68813641	-5.528024572	61.68254254	2.562056203	1	1	6	7	28
5	ECOG_RIGHT_5	29.51288421	29.51288421	ECOG	0.597455084	0.270016176	right	0	37.51915924	4.304913414	60.54126355	3.195169466	1	1	6	7	28
6	ECOG_LEFT_0	59.65344939	59.65344939	ECOG	0.292307677	0.101691799	left	1	-30.5961947	-58.9213488	72.67771703	2.436364064	1	2	5	7	27
7	ECOG_LEFT_1	58.89857074	58.89857074	ECOG	0.352107469	0.096753774	left	1	-30.51594476	-55.38324545	73.57326174	2.898943178	1	2	5	7	27
8	ECOG_LEFT_2	57.56435099	57.56435099	ECOG	0.243539604	0.063828737	left	1	-31.42569617	-50.83821812	74.28178	2.452957576	1	2	5	7	27
9	ECOG_LEFT_3	55.58858466	55.58858466	ECOG	0.148194472	0.084230955	left	1	-33.3555723	-46.55500542	74.26425439	2.213696794	1	2	5	7	27
10	ECOG_LEFT_4	55.7135401	55.7135401	ECOG	0.362397572	0.137236818	left	1	-32.2653178	-43.02319989	75.16433535	2.508229196	1	2	5	7	27
11	ECOG_LEFT_5	53.80108809	53.80108809	ECOG	0.339919038	0.118998633	left	1	-34.17519072	-37.73936103	74.96431955	2.15034095	1	2	5	7	27
12	ECOG_LEFT_6	52.23724698	52.23724698	ECOG	0.507876205	0.21977461	left	1	-37.14519478	-34.71858911	74.40324019	2.267634847	1	2	5	7	27
13	ECOG_LEFT_7	51.23932155	51.23932155	ECOG	0.454238142	0.135341629	left	1	-36.025054	-29.45364371	74.2168331	2.683807713	1	2	5	7	27
14	ECOG_LEFT_8	49.89962394	49.89962394	ECOG	0.413925157	0.100390228	left	1	-36.95504572	-25.44484127	73.482336	2.494711546	1	2	5	7	27
15	ECOG_LEFT_9	48.89723773	48.89723773	ECOG	0.388267266	0.172737291	left	1	-37.88503744	-21.43603883	72.74783897	2.22881136	1	2	5	7	27
16	ECOG_LEFT_10	46.07586436	46.07586436	ECOG	0.33505181	0.18479931	left	1	-40.8552786	-17.95086563	70.56125413	2.275833369	1	2	5	7	27
17	ECOG_LEFT_11	45.79933205	45.79933205	ECOG	0.208741421	0.08913023	left	1	-40.79526896	-14.94898717	70.01378348	2.148665726	1	2	5	7	27
18	ECOG_LEFT_12	45.89737781	45.89737781	ECOG	0.115403022	0.127150854	left	1	-41.70525747	-9.939558569	69.09679626	1.699308199	1	2	5	7	27
19	ECOG_LEFT_13	46.2404475	46.2404475	ECOG	0.09598719	0.138128071	left	1	-40.61524005	-5.943351764	68.37137168	2.597767523	1	2	5	7	27
20	ECOG_LEFT_14	57.88895947	57.88895947	ECOG	0.255036721	0.092827454	left	1	-32.60632077	-58.17623945	71.76464671	2.601504708	1	2	5	7	27
21	ECOG_LEFT_15	57.88249611	57.88249611	ECOG	0.326226952	0.094171373	left	1	-32.54607404	-55.63876226	72.84268161	2.844471753	1	2	5	7	27
22	ECOG_LEFT_16	56.31623438	56.31623438	ECOG	0.288791433	0.082924986	left	1	-34.49595339	-52.35617571	73.00764619	3.090092967	1	2	5	7	27
23	ECOG_LEFT_17	54.28543776	54.28543776	ECOG	0.29007912	0.090494828	left	1	-36.42582952	-48.07296301	72.99012058	2.102795627	1	2	5	7	27
24	ECOG_LEFT_18	52.59697131	52.59697131	ECOG	0.206994148	0.122246807	left	1	-38.35570565	-43.78975031	72.97259497	2.445900597	1	2	5	7	27
25	ECOG_LEFT_19	52.2110016	52.2110016	ECOG	0.089468656	0.045580147	left	1	-38.2554525	-39.2510208	73.68564948	1.270331109	1	2	5	7	27
26	ECOG_LEFT_20	50.22529725	50.22529725	ECOG	0.316491719	0.091982785	left	1	-40.19544878	-35.23592054	72.94661619	2.544933371	1	2	5	7	27
27	ECOG_LEFT_21	48.50736704	48.50736704	ECOG	0.251601613	0.060707995	left	1	-41.1254405	-31.2271181	72.21211916	1.732888282	1	2	5	7	27
28	ECOG_LEFT_22	47.02452471	47.02452471	ECOG	0.459251391	0.094089619	left	1	-41.04542766	-27.22461348	71.48215832	2.551581571	1	2	5	7	27
29	ECOG_LEFT_23	47.08475001	47.08475001	ECOG	0.484913139	0.199921425	left	1	-41.96529922	-22.94769859	71.4691689	2.946592063	1	2	5	7	27
30	ECOG_LEFT_24	45.41910541	45.41910541	ECOG	0.419737826	0.129033266	left	1	-43.91541566	-19.20071078	70.00862794	2.325536915	1	2	5	7	27
31	ECOG_LEFT_25	45.110858	45.110858	ECOG	0.203676762	0.05365195	left	1	-44.82540416	-14.19128218	69.09164071	2.324785659	1	2	5	7	27
32	ECOG_LEFT_26	45.16697543	45.16697543	ECOG	0.121631851	0.067033575	left	1	-44.74539132	-10.18877756	68.36167987	2.255557295	1	2	5	7	27
33	ECOG_LEFT_27	45.44896342	45.44896342	ECOG	0.062071678	0.066771157	left	1	-43.6553739	-6.192570752	67.63625529	2.067922105	1	2	5	7	27
34	ECOG_RIGHT_0	24.68045824	24.68045824	ECOG	0.174597408	0.040622183	right	1	29.12607696	-47.416972	70.67875147	2.712465303	2	1	7	5	27
35	ECOG_RIGHT_1	21.23039539	21.23039539	ECOG	0.149999019	0.04810851	right	1	28.2062054	-43.14005712	70.65861791	2.54544187	2	1	7	5	27
36	ECOG_RIGHT_2	17.45253105	17.45253105	ECOG	0.168008782	0.082857581	right	1	29.31646311	-38.60762543	71.77088355	2.68546171	2	1	7	5	27
37	ECOG_RIGHT_3	12.51520934	12.51520934	ECOG	0.253791408	0.089791062	right	1	31.44660846	-33.34897785	71.48898365	2.468186558	2	1	7	5	27
38	ECOG_RIGHT_4	11.31298762	11.31298762	ECOG	0.29808851	0.090631423	right	1	30.50673368	-30.07268912	71.75170991	1.782147521	2	1	7	5	27
39	ECOG_RIGHT_5	9.197853492	9.197853492	ECOG	0.509607934	0.163162584	right	1	31.62687446	-24.80774372	71.46277886	2.340647965	2	1	7	5	27
40	ECOG_RIGHT_6	8.783046551	8.783046551	ECOG	0.565925244	0.109445466	right	1	34.72701794	-21.55664626	71.75362975	2.764498654	2	1	7	5	27
41	ECOG_RIGHT_7	11.67214237	11.67214237	ECOG	0.421615038	0.049279298	right	1	34.83715415	-16.28540304	71.45766754	2.166227113	2	1	7	5	27
42	ECOG_RIGHT_8	14.24168768	14.24168768	ECOG	0.115658564	0.026584318	right	1	35.92717157	-12.28919624	70.33325942	2.227987648	2	1	7	5	27
43	ECOG_RIGHT_9	17.50018941	17.50018941	ECOG	0.176490933	0.090509244	right	1	37.01718898	-8.292989431	69.2088513	2.466970975	2	1	7	5	27
44	ECOG_RIGHT_10	20.87286695	20.87286695	ECOG	0.148283832	0.106576872	right	1	40.11709538	-4.577490705	66.98016862	2.143022053	2	1	7	5	27
45	ECOG_RIGHT_11	23.7347764	23.7347764	ECOG	0.068737913	0.144056218	right	1	40.17710501	-1.575612238	66.13158917	2.273290448	2	1	7	5	27
46	ECOG_RIGHT_12	28.35112494	28.35112494	ECOG	0.043963476	0.062527427	right	1	40.26700092	3.159406099	63.59895319	2.439228033	2	1	7	5	27
47	ECOG_RIGHT_13	32.52385783	32.52385783	ECOG	0.046894612	0.043353894	right	1	39.34712935	7.436320982	63.57881964	2.08375409	2	1	7	5	27
48	ECOG_RIGHT_14	23.08497471	23.08497471	ECOG	0.256355138	0.072258968	right	1	31.15596915	-46.69705393	69.29161709	2.700635281	2	1	7	5	27
49	ECOG_RIGHT_15	20.40089939	20.40089939	ECOG	0.174463015	0.049180863	right	1	30.21609438	-43.4207652	69.55434335	2.509645874	2	1	7	5	27
50	ECOG_RIGHT_16	15.91504856	15.91504856	ECOG	0.256775235	0.079319531	right	1	32.32623651	-39.16274377	69.55530327	2.79907497	2	1	7	5	27
51	ECOG_RIGHT_17	11.64249714	11.64249714	ECOG	0.376499491	0.116632769	right	1	34.43637864	-34.90472234	69.55626319	2.527361812	2	1	7	5	27
52	ECOG_RIGHT_18	8.047394765	8.047394765	ECOG	0.291580852	0.095255218	right	1	35.53651621	-30.64040309	69.55019195	2.2122911	2	1	7	5	27
53	ECOG_RIGHT_19	5.723888686	5.723888686	ECOG	0.64427136	0.161562142	right	1	36.63665377	-26.37608385	69.54412071	2.586581792	2	1	7	5	27
54	ECOG_RIGHT_20	6.488819563	6.488819563	ECOG	0.559476473	0.153638488	right	1	38.7467959	-22.11806242	69.54508063	2.860535824	2	1	7	5	27
55	ECOG_RIGHT_21	8.654404982	8.654404982	ECOG	0.544242209	0.097560741	right	1	39.83681332	-18.12185561	68.42067252	2.789600321	2	1	7	5	27
56	ECOG_RIGHT_22	12.34052556	12.34052556	ECOG	0.19336422	0.085331061	right	1	39.92694632	-13.85123855	68.40757012	2.427997595	2	1	7	5	27
57	ECOG_RIGHT_23	16.00891045	16.00891045	ECOG	0.182080122	0.070496389	right	1	41.01696373	-9.855031744	67.283162	2.283008704	2	1	7	5	27
58	ECOG_RIGHT_24	20.20523858	20.20523858	ECOG	0.110741585	0.119738525	right	1	43.11698571	-5.865122757	66.16578504	1.817516753	2	1	7	5	27
59	ECOG_RIGHT_25	24.93710636	24.93710636	ECOG	0.081076177	0.076748173	right	1	43.21700177	-0.861991979	64.75148595	1.834639695	2	1	7	5	27
60	ECOG_RIGHT_26	28.61189628	28.61189628	ECOG	0.03695431	0.077891591	right	1	43.28689446	2.872400202	62.50170979	1.641336742	2	1	7	5	27
61	ECOG_RIGHT_27	32.61077343	32.61077343	ECOG	0.016362108	0.037479405	right	1	43.36690731	6.874904825	61.37027052	2.516334205	2	1	7	5	27
62	ECOG_LEFT_0	38.11303542	38.11303542	ECOG	0.01347394	0.170316438	left	4	-21.33445138	-58.92032609	71.52366489	3.160494484	2	2	13	12	33
63	ECOG_LEFT_1	31.35120267	31.35120267	ECOG	0.006399957	0.19488149	left	4	-22.92401978	-50.69262099	75.16485184	3.073979214	2	2	13	12	33
64	ECOG_LEFT_2	21.24010955	21.24010955	ECOG	0	0.193428494	left	4	-27.42893488	-38.94533587	76.84774585	3.437339486	2	2	13	12	33
65	ECOG_LEFT_3	18.28074206	18.28074206	ECOG	0	0.169951819	left	4	-26.93765389	-30.87249681	78.0871751	3.373958726	2	2	13	12	33
66	ECOG_LEFT_4	15.04198379	15.04198379	ECOG	0	0.244440113	left	4	-30.42831682	-19.66556916	76.43455283	3.124874297	2	2	13	12	33
67	ECOG_LEFT_5	19.98038771	19.98038771	ECOG	0	0.205189158	left	4	-27.80456832	-10.90935033	74.77559841	3.645292677	2	2	13	12	33
68	ECOG_LEFT_6	26.29752592	26.29752592	ECOG	0.019248381	0.294063015	left	4	-30.28097909	-0.242780133	69.78745987	3.228845666	2	2	13	12	33
69	ECOG_LEFT_7	35.94436335	35.94436335	ECOG	0.017243063	0.118671017	left	4	-31.71641998	10.41205934	67.17286809	2.812967237	2	2	13	12	33
70	ECOG_RIGHT_0	32.4478231	32.4478231	ECOG	0.001933123	0.286555729	right	4	36.18225633	-57.42995043	64.70059576	3.27086766	2	2	12	13	33
71	ECOG_RIGHT_1	23.26866455	23.26866455	ECOG	0.062422945	0.351466948	right	4	37.79175267	-48.13337414	66.3771576	4.503539363	2	2	12	13	33
72	ECOG_RIGHT_2	15.31112016	15.31112016	ECOG	0.044951866	0.287094184	right	4	40.38987384	-39.77437745	66.15799137	2.80518871	2	2	12	13	33
73	ECOG_RIGHT_3	10.68612235	10.68612235	ECOG	0.014792724	0.383534983	right	4	45.04321704	-31.96746895	64.97685563	3.66801598	2	2	12	13	33
74	ECOG_RIGHT_4	11.85535577	11.85535577	ECOG	0.163216507	0.396743331	right	4	48.70757197	-23.26678237	63.30849755	3.04699708	2	2	12	13	33
75	ECOG_RIGHT_5	15.73124545	15.73124545	ECOG	0.12112088	0.400102894	right	4	49.1984895	-15.23774485	62.1649764	3.177737778	2	2	12	13	33
76	ECOG_RIGHT_6	22.91838579	22.91838579	ECOG	0	0.046821701	right	4	50.70365919	-7.749064787	57.68593898	4.460246352	2	2	12	13	33
77	ECOG_RIGHT_7	30.58064925	30.58064925	ECOG	0	0.042044076	right	4	51.19421326	0.236171205	54.15946742	2.803899764	2	2	12	13	33
78	ECOG_LEFT_0	26.72253689	26.72253689	ECOG	0.129685696	0.051646455	left	5	-58.41869039	-13.9623285	52.44562906	2.916455001	2	1	8	3	31
79	ECOG_LEFT_1	22.14153392	22.14153392	ECOG	0.16911756	0.070311793	left	5	-57.51509913	-21.5698493	56.40972343	3.104438822	2	1	8	3	31
80	ECOG_LEFT_2	16.37999249	16.37999249	ECOG	0.086728137	0.043408366	left	5	-52.72045409	-29.14040668	61.99288522	3.000987736	2	1	8	3	31
81	ECOG_LEFT_3	18.60271069	18.60271069	ECOG	0.080632013	0.05312829	left	5	-49.7468157	-38.537043	64.57271393	2.378768701	2	1	8	3	31
82	ECOG_LEFT_4	23.05121606	23.05121606	ECOG	0.128188882	0.118165617	left	5	-45.42808314	-46.39301698	65.63242176	3.101666747	2	1	8	3	31
83	ECOG_LEFT_5	30.48614256	30.48614256	ECOG	0.37205257	0.195019359	left	5	-43.90336666	-54.69346812	64.21533174	3.617876233	2	1	8	3	31
84	ECOG_LEFT_6	37.76146465	37.76146465	ECOG	0.332659913	0.157648683	left	5	-45.92222808	-61.41611027	59.50678603	3.511696827	2	1	8	3	31
85	ECOG_LEFT_7	44.19692889	44.19692889	ECOG	0.054827795	0.044142109	left	5	-45.82182468	-67.3128845	54.77157989	3.412905433	2	1	8	3	31
86	ECOG_RIGHT_0	29.02632167	29.02632167	ECOG	0.038169322	0	right	5	45.37195921	-52.78602963	63.38827637	1.960412535	1	2	3	8	31
87	ECOG_RIGHT_1	22.68696497	22.68696497	ECOG	0.045163457	0	right	5	49.05878184	-44.21544445	64.22551031	1.966260748	1	2	3	8	31
88	ECOG_RIGHT_2	20.76163337	20.76163337	ECOG	0.001548619	0	right	5	54.04148094	-36.71918036	62.18501815	0.635482973	1	2	3	8	31
89	ECOG_RIGHT_3	20.85826929	20.85826929	ECOG	0.063868918	0	right	5	57.02894345	-29.07469615	59.8399912	1.965172687	1	2	3	8	31
90	ECOG_RIGHT_4	22.08548402	22.08548402	ECOG	0.052824359	0	right	5	57.92174999	-20.94858813	58.20042728	2.308020583	1	2	3	8	31
91	ECOG_RIGHT_5	27.89367873	27.89367873	ECOG	0.068220484	0	right	5	59.33626234	-13.18200677	52.18967682	2.405928719	1	2	3	8	31
92	ECOG_RIGHT_6	34.40919296	34.40919296	ECOG	0	0	right	5	60.52732706	-6.056109775	47.5201194	1.971226826	1	2	3	8	31
93	ECOG_RIGHT_7	41.22409833	41.22409833	ECOG	0	0	right	5	61.69378294	-0.237704502	42.17175937	2.956542722	1	2	3	8	31
94	ECOG_LEFT_0	101.4332226	101.4332226	ECOG	0	0	left	6	-41.56441335	38.70967937	-14.79683704	1.627175962	3	1	15	7	32
95	ECOG_LEFT_1	95.39618094	95.39618094	ECOG	0	0	left	6	-48.76519539	37.37805512	-7.210882271	1.531027465	3	1	15	7	32
96	ECOG_LEFT_2	86.75730781	86.75730781	ECOG	0	0	left	6	-53.21326756	34.53562139	3.012540642	1.248344383	3	1	15	7	32
97	ECOG_LEFT_3	79.24219095	79.24219095	ECOG	0	0	left	6	-55.0096794	31.12149196	11.03440349	0.805406698	3	1	15	7	32
98	ECOG_LEFT_4	70.6536979	70.6536979	ECOG	0	0	left	6	-55.02295069	26.67574075	19.31514693	1.879474279	3	1	15	7	32
99	ECOG_LEFT_5	62.05643162	62.05643162	ECOG	0	0	left	6	-54.11717742	22.22035873	27.55496381	1.228154016	3	1	15	7	32
100	ECOG_LEFT_6	53.34291521	53.34291521	ECOG	0	0	left	6	-50.2938487	19.29124775	37.41004771	1.976665798	3	1	15	7	32
101	ECOG_LEFT_7	46.62350549	46.62350549	ECOG	0	0	left	6	-40.6881457	19.1432772	49.45627544	2.269487249	3	1	15	7	32
102	ECOG_LEFT_8	37.03431719	37.03431719	ECOG	0.15360294	0.047599126	left	6	-59.09577759	-50.46178766	48.66981306	2.926587795	3	1	15	7	32
103	ECOG_LEFT_9	32.8726104	32.8726104	ECOG	0.115382072	0.062224753	left	6	-56.98958149	-47.64212401	51.02466313	2.95473789	3	1	15	7	32
104	ECOG_LEFT_10	30.59005418	30.59005418	ECOG	0.159881873	0.049846501	left	6	-58.50240315	-43.03061843	51.8223618	2.994866133	3	1	15	7	32
105	ECOG_LEFT_11	28.26120413	28.26120413	ECOG	0.201082252	0.045382543	left	6	-57.42293678	-41.48508579	53.51948193	2.866044391	3	1	15	7	32
106	ECOG_LEFT_12	28.28363056	28.28363056	ECOG	0.1986676	0.07431461	left	6	-59.90532776	-36.39439251	51.93859306	3.046003004	3	1	15	7	32
107	ECOG_LEFT_13	27.14737925	27.14737925	ECOG	0.260523988	0.069562206	left	6	-59.74269405	-34.09827053	52.29651585	3.051696491	3	1	15	7	32
108	ECOG_LEFT_14	24.52253841	24.52253841	ECOG	0.279814823	0.060922919	left	6	-58.44343355	-28.50329719	52.63070114	3.0622385	3	1	15	7	32
109	ECOG_LEFT_15	25.32926006	25.32926006	ECOG	0.22009589	0.065213376	left	6	-59.25258103	-26.46894604	51.99016028	3.286306517	3	1	15	7	32
110	ECOG_LEFT_16	23.06374966	23.06374966	ECOG	0.278469914	0.115481387	left	6	-57.14417305	-22.90832385	52.96488644	3.089849624	3	1	15	7	32
111	ECOG_LEFT_17	24.99956917	24.99956917	ECOG	0.280500538	0.091624316	left	6	-57.84342347	-18.84925236	51.64287817	3.033471029	3	1	15	7	32
112	ECOG_LEFT_18	25.1184879	25.1184879	ECOG	0.263373437	0.035201992	left	6	-56.70679669	-15.550401	51.61914068	4.420366197	3	1	15	7	32
113	ECOG_LEFT_19	25.77765061	25.77765061	ECOG	0.265631629	0.045450943	left	6	-56.54416298	-13.25427902	51.97706346	3.149370867	3	1	15	7	32
114	ECOG_LEFT_20	26.75645362	26.75645362	ECOG	0.216782673	0.030191225	left	6	-54.43354312	-8.9526983	51.57166571	3.178418758	3	1	15	7	32
115	ECOG_LEFT_21	26.90265536	26.90265536	ECOG	0.121433496	0.025340205	left	6	-51.40609059	-5.401706921	52.50546531	2.714056769	3	1	15	7	32
116	ECOG_LEFT_22	40.10029729	40.10029729	ECOG	0.10672687	0.035251218	left	6	-61.95617264	-50.23473999	45.33368843	3.473347487	3	1	15	7	32
117	ECOG_LEFT_23	36.58714014	36.58714014	ECOG	0.102087614	0.008755933	left	6	-61.6331171	-46.38345455	47.4296579	2.476480858	3	1	15	7	32
118	ECOG_LEFT_24	34.35820754	34.35820754	ECOG	0.117871276	0.027478361	left	6	-61.41774674	-43.81593093	48.82697088	4.017185699	3	1	15	7	32
119	ECOG_LEFT_25	33.19305579	33.19305579	ECOG	0.172045155	0.027716948	left	6	-62.92835652	-38.46346682	48.24454565	2.875743567	3	1	15	7	32
120	ECOG_LEFT_26	30.72343851	30.72343851	ECOG	0.261943801	0.057790979	left	6	-62.49319204	-31.8465025	48.2789238	3.167523434	3	1	15	7	32
121	ECOG_LEFT_27	32.02602131	32.02602131	ECOG	0.28088502	0.048082076	left	6	-62.76572281	-36.16734484	48.60246843	3.174921781	3	1	15	7	32
122	ECOG_LEFT_28	28.60221161	28.60221161	ECOG	0.338747069	0.052171918	left	6	-61.35877713	-29.28860969	49.63531022	3.295512728	3	1	15	7	32
123	ECOG_LEFT_29	28.21156736	28.21156736	ECOG	0.361941607	0.043397768	left	6	-61.08624636	-24.96776736	49.31176558	3.462272569	3	1	15	7	32
124	ECOG_LEFT_30	28.21547578	28.21547578	ECOG	0.198477576	0.027046542	left	6	-60.86866412	-21.6592852	49.32895466	4.260193433	3	1	15	7	32
125	ECOG_LEFT_31	29.51223425	29.51223425	ECOG	0.273845248	0.096474365	left	6	-60.64887	-17.60984451	47.96601983	3.281211451	3	1	15	7	32
126	ECOG_LEFT_32	29.6463532	29.6463532	ECOG	0.274834513	0.097978264	left	6	-59.51224321	-14.31099316	47.94228234	3.092883395	3	1	15	7	32
127	ECOG_LEFT_33	29.58720964	29.58720964	ECOG	0.313646416	0.054168798	left	6	-58.43056495	-12.02450198	48.25927857	3.988188527	3	1	15	7	32
128	ECOG_LEFT_34	31.10987396	31.10987396	ECOG	0.243732983	0.047336324	left	6	-57.23898964	-7.713290453	47.89480737	4.407103211	3	1	15	7	32
129	ECOG_LEFT_35	32.38530486	32.38530486	ECOG	0.204221832	0.036791317	left	6	-56.10236285	-4.414439101	47.87106989	2.898332705	3	1	15	7	32
130	ECOG_RIGHT_0	114.0775246	114.0775246	ECOG	0.124814705	0.013912567	right	6	22.72220104	52.02004098	-18.93213709	1.751029484	1	3	8	13	32
131	ECOG_RIGHT_1	108.0796199	108.0796199	ECOG	0.017906134	0	right	6	33.35905753	54.62811851	-8.988427236	0.359392963	1	3	8	13	32
132	ECOG_RIGHT_2	98.65404748	98.65404748	ECOG	0.206642897	0.014131544	right	6	38.36732593	53.78734345	4.642557191	1.923514585	1	3	8	13	32
133	ECOG_RIGHT_3	89.00962186	89.00962186	ECOG	0.027445397	0	right	6	42.02802094	48.56211048	14.13971831	0.244312836	1	3	8	13	32
134	ECOG_RIGHT_4	79.5509095	79.5509095	ECOG	0.138266719	0.012756972	right	6	42.93158232	43.36576993	23.7596591	1.846993342	1	3	8	13	32
135	ECOG_RIGHT_5	69.78940807	69.78940807	ECOG	0.192393553	0.005014011	right	6	44.64650306	36.87603676	32.64001684	1.81109283	1	3	8	13	32
136	ECOG_RIGHT_6	61.32375797	61.32375797	ECOG	0.148523327	0.009915098	right	6	43.60650206	31.15615454	40.26303035	2.343111112	1	3	8	13	32
137	ECOG_RIGHT_7	50.03621024	50.03621024	ECOG	0.081319926	0.009419945	right	6	42.40165546	22.39919181	48.90824498	1.681400895	1	3	8	13	32
138	ECOG_RIGHT_8	27.15325652	27.15325652	ECOG	0.125288999	0.032765989	right	6	29.1516544	-50.19627734	70.39143324	2.201039756	1	3	8	13	32
139	ECOG_RIGHT_9	23.56499018	23.56499018	ECOG	0.08110219	0.011305164	right	6	31.26006238	-46.63565516	71.3661594	3.701387061	1	3	8	13	32
140	ECOG_RIGHT_10	18.59162429	18.59162429	ECOG	0.136151297	0.006963146	right	6	31.64027833	-41.03105101	71.74127126	3.749476509	1	3	8	13	32
141	ECOG_RIGHT_11	16.09929132	16.09929132	ECOG	0.141355936	0.017247508	right	6	30.93881603	-37.71293805	71.79938689	3.770468841	1	3	8	13	32
142	ECOG_RIGHT_12	12.34641626	12.34641626	ECOG	0.121875115	0.011260183	right	6	34.83257645	-34.44297912	71.65286973	3.797559002	1	3	8	13	32
143	ECOG_RIGHT_13	8.886115814	8.886115814	ECOG	0.087327303	0.024838139	right	6	36.94319631	-30.1413984	71.24747198	3.847466626	1	3	8	13	32
144	ECOG_RIGHT_14	6.652058308	6.652058308	ECOG	0.135320431	0.015207015	right	6	38.18972015	-24.8178267	70.54226708	3.7662203	1	3	8	13	32
145	ECOG_RIGHT_15	7.735777706	7.735777706	ECOG	0.192362021	0.0123328	right	6	37.54320638	-20.48735356	70.259649	3.45048872	1	3	8	13	32
146	ECOG_RIGHT_16	9.319953588	9.319953588	ECOG	0.169448425	0.003478984	right	6	35.86996289	-17.43101143	69.31930099	3.335798862	1	3	8	13	32
147	ECOG_RIGHT_17	12.26431571	12.26431571	ECOG	0.171610717	0.01251516	right	6	37.9278461	-13.40083235	67.87451305	3.854684217	1	3	8	13	32
148	ECOG_RIGHT_18	16.44041983	16.44041983	ECOG	0.365936348	0.020094964	right	6	35.44324324	-9.051097605	67.67374808	3.864178126	1	3	8	13	32
149	ECOG_RIGHT_19	20.80303762	20.80303762	ECOG	0.297459104	0.003750854	right	6	35.66524924	-4.260698378	64.93068934	3.942219387	1	3	8	13	32
150	ECOG_RIGHT_20	23.87761884	23.87761884	ECOG	0.228720988	0.023885304	right	6	34.91105029	-1.213987054	63.94941478	2.88470326	1	3	8	13	32
151	ECOG_RIGHT_21	29.36679036	29.36679036	ECOG	0.188668131	0.030916246	right	6	33.4004405	4.13847706	63.36698955	2.82711058	1	3	8	13	32
152	ECOG_RIGHT_22	25.27648985	25.27648985	ECOG	0.10786298	0.01227306	right	6	33.69635235	-49.77487447	67.76728635	2.987083411	1	3	8	13	32
153	ECOG_RIGHT_23	21.83993306	21.83993306	ECOG	0.1589058	0	right	6	34.88571579	-46.20462148	68.78293907	2.524723667	1	3	8	13	32
154	ECOG_RIGHT_24	17.51674133	17.51674133	ECOG	0.196378262	0.0167439	right	6	36.13002775	-41.62200832	69.45785807	3.925695238	1	3	8	13	32
155	ECOG_RIGHT_25	13.37383632	13.37383632	ECOG	0.158720411	0.016318103	right	6	38.24064761	-37.3204276	69.05246033	3.860148034	1	3	8	13	32
156	ECOG_RIGHT_26	9.855358414	9.855358414	ECOG	0.105572549	0	right	6	40.35126747	-33.01884688	68.64706258	3.78590562	1	3	8	13	32
157	ECOG_RIGHT_27	7.261168602	7.261168602	ECOG	0.072587846	0.018509201	right	6	41.54284279	-28.70763535	68.28259138	3.872070301	1	3	8	13	32
158	ECOG_LEFT_0	10.84347466	10.84347466	ECOG	0.000977902	0	left	7	-34.19106518	-33.78922865	69.6956376	2.447438606	3	2	16	12	52
159	ECOG_LEFT_1	4.767630343	4.767630343	ECOG	0.040295595	0.012180813	left	7	-35.43360925	-24.44872715	68.46909581	3.81459718	3	2	16	12	52
160	ECOG_LEFT_2	10.12650587	10.12650587	ECOG	0.041649815	0	left	7	-36.70911099	-14.91670516	64.8880709	2.574121073	3	2	16	12	52
161	ECOG_LEFT_3	18.44571116	18.44571116	ECOG	0.012016969	0	left	7	-39.62066813	-7.214856039	59.86901792	2.277389405	3	2	16	12	52
162	ECOG_LEFT_4	28.99313223	28.99313223	ECOG	0	0	left	7	-44.36932815	0.127977926	51.55494297	3.29169236	3	2	16	12	52
163	ECOG_LEFT_5	38.55139984	38.55139984	ECOG	0	0	left	7	-46.31124661	7.561036514	45.58017326	2.002222644	3	2	16	12	52
164	ECOG_LEFT_0	19.32352238	19.32352238	ECOG	0.196668834	0.011046882	left	8	-31.71125458	-43.3060207	67.21205464	3.017120574	2	3	16	18	55
165	ECOG_LEFT_1	7.719807804	7.719807804	ECOG	0.247908528	0	left	8	-37.0925413	-32.07923333	67.07755164	3.145692259	2	3	16	18	55
166	ECOG_LEFT_2	4.326566491	4.326566491	ECOG	0.442235016	0.005959301	left	8	-40.07019771	-22.25517174	65.32626598	3.090957202	2	3	16	18	55
167	ECOG_LEFT_3	12.2029402	12.2029402	ECOG	0.190917049	0.006176123	left	8	-40.68279615	-13.41265223	62.95974348	3.160613947	2	3	16	18	55
168	ECOG_LEFT_4	21.15268387	21.15268387	ECOG	0.004647535	0.007850134	left	8	-41.29539459	-4.570132723	60.59322098	3.360246043	2	3	16	18	55
169	ECOG_LEFT_5	31.75861506	31.75861506	ECOG	0	0.005354456	left	8	-43.22373414	4.596435582	54.30846942	3.040066912	2	3	16	18	55
170	ECOG_LEFT_0	16.02134556	16.02134556	ECOG	0.061539653	0.003506182	left	9	-25.06892247	-26.33774145	74.60864508	1.283560846	3	2	17.5	12	50
171	ECOG_LEFT_1	10.81391697	10.81391697	ECOG	0.008749604	0	left	9	-35.01778655	-16.69116038	70.63135086	0.279151826	3	2	17.5	12	50
172	ECOG_LEFT_2	15.60926632	15.60926632	ECOG	0.025800506	0	left	9	-41.16403381	-10.02068775	65.38932439	0.930383758	3	2	17.5	12	50
173	ECOG_LEFT_3	25.17483601	25.17483601	ECOG	0.045199861	0	left	9	-47.27430797	-2.434359978	59.64077368	0.737482621	3	2	17.5	12	50
174	ECOG_LEFT_4	32.71690587	32.71690587	ECOG	0.017698781	0.010650696	left	9	-48.26625772	3.992097879	53.85477316	1.526505062	3	2	17.5	12	50
175	ECOG_LEFT_5	41.31683723	41.31683723	ECOG	0.005139835	0	left	9	-46.78720283	12.66058447	50.10856102	1.377192357	3	2	17.5	12	50
176	ECOG_LEFT_0	17.55113298	17.55113298	ECOG	0.392282085	0.044818689	left	10	-53.40543113	-22.0825916	58.48703105	2.566269127	3	2	16	15	62
177	ECOG_LEFT_1	22.79845977	22.79845977	ECOG	0.210456221	0	left	10	-53.73699777	-12.09026969	55.45707681	1.598437274	3	2	16	15	62
178	ECOG_LEFT_2	28.80534114	28.80534114	ECOG	0	0	left	10	-52.19412884	-3.000749773	53.27996658	1.593415547	3	2	16	15	62
179	ECOG_LEFT_3	36.52376491	36.52376491	ECOG	0.06599949	0	left	10	-51.46479192	5.068287773	49.14559767	2.760966706	3	2	16	15	62
180	ECOG_LEFT_4	44.38086541	44.38086541	ECOG	0	0	left	10	-49.75302693	13.10495837	45.15766293	2.481449195	3	2	16	15	62
181	ECOG_LEFT_5	51.93620562	51.93620562	ECOG	0.024375887	0	left	10	-45.17842577	21.57095278	42.51444292	1.963079634	3	2	16	15	62
182	ECOG_RIGHT_0	11.04476135	11.04476135	ECOG	0.109875608	0.013627654	right	10	47.05582853	-20.44116372	63.71003876	0.684104113	2	3	15	16	62
183	ECOG_RIGHT_1	17.24511424	17.24511424	ECOG	0.005339908	0	right	10	46.54939331	-10.76048525	62.14547247	0.906357364	2	3	15	16	62
184	ECOG_RIGHT_2	26.38197109	26.38197109	ECOG	0	0	right	10	46.21782666	-0.768163338	59.11551824	1.128955977	2	3	15	16	62
185	ECOG_RIGHT_3	35.29994214	35.29994214	ECOG	0	0	right	10	45.79583946	8.386090473	56.64553969	1.081260876	2	3	15	16	62
186	ECOG_RIGHT_4	45.13129368	45.13129368	ECOG	0	0	right	10	45.54872085	17.85198772	52.7101732	1.553358627	2	3	15	16	62
187	ECOG_RIGHT_5	54.01093696	54.01093696	ECOG	0	0.018271309	right	10	39.31661329	26.67401856	48.45617743	1.426633647	2	3	15	16	62
188	ECOG_LEFT_0	27.91420869	27.91420869	ECOG	0.111205709	0	left	13	-24.31175252	-48.66622827	71.62371708	1.733862887	3	2	17	12	48
189	ECOG_LEFT_1	18.33856816	18.33856816	ECOG	0.095073342	0	left	13	-26.48466624	-38.62755841	70.32617498	1.464599518	3	2	17	12	48
190	ECOG_LEFT_2	10.98811512	10.98811512	ECOG	0.006696095	0	left	13	-28.33275588	-28.4335258	69.81622333	0.659720677	3	2	17	12	48
191	ECOG_LEFT_3	9.526075216	9.526075216	ECOG	0.081411661	0	left	13	-30.40031442	-19.46383251	68.06707619	1.310660463	3	2	17	12	48
192	ECOG_LEFT_4	13.84417998	13.84417998	ECOG	0.080304189	0.001185071	left	13	-33.50193152	-11.60505839	64.01937905	1.332272082	3	2	17	12	48
193	ECOG_LEFT_5	22.71341739	22.71341739	ECOG	0.022551638	0.003040332	left	13	-36.97793658	-2.737175562	59.49827914	1.176341335	3	2	17	12	48
194	ECOG_RIGHT_0	24.98430741	24.98430741	ECOG	0.050392237	0.024718371	right	14	15.75948443	-36.33389497	70.67824381	2.25853303	1	2	6	8	31
195	ECOG_RIGHT_1	17.77858066	17.77858066	ECOG	0.059377538	0.050032228	right	14	19.98270199	-26.37155434	68.9606791	2.163232191	1	2	6	8	31
196	ECOG_RIGHT_2	16.80205912	16.80205912	ECOG	0.009074057	0	right	14	22.39200905	-16.87765229	65.71559277	2.196806165	1	2	6	8	31
197	ECOG_RIGHT_3	20.01328568	20.01328568	ECOG	0.062357808	0.030276597	right	14	27.31827282	-7.758095301	60.91576832	1.958027801	1	2	6	8	31
198	ECOG_RIGHT_4	25.85853539	25.85853539	ECOG	0.005657715	0.043382707	right	14	40.32268352	-1.236477735	54.36056867	1.888533276	1	2	6	8	31
199	ECOG_RIGHT_5	35.62862034	35.62862034	ECOG	0	0	right	14	43.42095913	6.349382981	48.33519683	2.542724249	1	2	6	8	31
200	STN_RIGHT_0	2.689531058	2.689531058	STN	0.506261091	0.007864643	right	0	11.82808023	-15.15974827	-7.769098456	1.210272425	1	1	6	7	28
201	STN_RIGHT_1	0.905022793	0.905022793	STN	0.681787244	0.109035702	right	0	12.3908352	-14.29250828	-5.936798699	1.76878745	1	1	6	7	28
202	STN_RIGHT_2	1.812624734	1.812624734	STN	0.598447827	0.033810828	right	0	12.93084915	-13.41284994	-4.09165662	0.586590054	1	1	6	7	28
203	STN_LEFT_0	2.783463833	2.783463833	STN	0.055689344	0.152188825	left	1	-13.13098855	-15.2448243	-7.889282626	1.781275098	1	2	5	7	27
204	STN_LEFT_1	1.552767432	1.552767432	STN	0.034919359	0.038342306	left	1	-13.89588061	-14.22256347	-6.008872374	0.615218482	1	2	5	7	27
205	STN_LEFT_2	2.674323555	2.674323555	STN	0	0	left	1	-14.64233631	-13.20733294	-4.17952626	0	1	2	5	7	27
206	STN_RIGHT_0	1.972093563	1.972093563	STN	0	0	right	1	12.96246441	-12.31780379	-7.466866129	1.093436237	2	1	7	5	27
207	STN_RIGHT_1	2.363038974	2.363038974	STN	0	0	right	1	13.75842437	-11.37870574	-5.607106818	0.34707593	2	1	7	5	27
208	STN_RIGHT_2	4.102193104	4.102193104	STN	0	0	right	1	14.52632621	-10.4612844	-3.785562708	0.221305044	2	1	7	5	27
209	STN_LEFT_0	4.402250147	4.402250147	STN	0.018694626	0.000199117	left	4	-13.07562124	-15.24096917	-9.842621031	3.38746278	2	2	13	12	33
210	STN_LEFT_1	2.533675847	2.533675847	STN	0.037089901	0	left	4	-13.59789339	-14.41025393	-7.963537298	3.505300496	2	2	13	12	33
211	STN_LEFT_2	1.589448369	1.589448369	STN	0	0.110648894	left	4	-14.14143163	-13.58861663	-6.107430994	3.733636614	2	2	13	12	33
212	STN_RIGHT_0	3.394985273	3.394985273	STN	0	0	right	4	9.584565095	-14.39837589	-7.12555081	0	2	2	12	13	33
213	STN_RIGHT_1	2.323100147	2.323100147	STN	0.025208903	0	right	4	10.3008176	-13.56041574	-5.446329152	0.781585151	2	2	12	13	33
214	STN_RIGHT_2	2.675495338	2.675495338	STN	0.088100105	0.358838411	right	4	11.05589174	-12.72459695	-3.780600093	2.241300027	2	2	12	13	33
215	STN_LEFT_0	1.321214268	1.321214268	STN	0.198469157	0.060687199	left	5	-13.11867968	-14.48774351	-6.412125695	2.947779327	2	1	8	3	31
216	STN_LEFT_1	1.83024035	1.83024035	STN	0.125142479	0.024796507	left	5	-13.78558739	-13.83495011	-4.560131239	3.409251342	2	1	8	3	31
217	STN_LEFT_2	3.664012335	3.664012335	STN	0.046599993	0.023148103	left	5	-14.46594142	-13.17969662	-2.737082556	2.146525028	2	1	8	3	31
218	STN_RIGHT_0	5.741546957	5.741546957	STN	0.101505625	0	right	5	7.867534473	-15.84048646	-8.072445388	2.176291555	1	2	3	8	31
219	STN_RIGHT_1	4.142366171	4.142366171	STN	0.015935753	0	right	5	8.726297261	-14.84469504	-6.3698228	0.909410512	1	2	3	8	31
220	STN_RIGHT_2	3.20813097	3.20813097	STN	0	0	right	5	9.627427227	-13.86735047	-4.701561347	0.268525108	1	2	3	8	31
221	STN_LEFT_0	4.471772425	4.471772425	STN	0.009458984	0.008050305	left	6	-12.5662	-17.7477	-6.9567	0.702952014	3	1	15	7	32
222	STN_LEFT_1	3.353302079	3.353302079	STN	0	0.001479083	left	6	-13.3345	-16.6587	-5.5217	0.166226017	3	1	15	7	32
223	STN_LEFT_2	3.367186892	3.367186892	STN	0	0	left	6	-14.1095	-15.7249	-3.96217	0.595245686	3	1	15	7	32
224	STN_RIGHT_0	3.714155841	3.714155841	STN	0	0	right	6	11.5239	-14.5084	-9.2572	0.217383196	1	3	8	13	32
225	STN_RIGHT_1	1.959381936	1.959381936	STN	0	0.032613811	right	6	12.0304	-13.513	-7.7479	0.337297338	1	3	8	13	32
226	STN_RIGHT_2	1.03505737	1.03505737	STN	0	0	right	6	12.5544	-12.4254	-6.1882	0	1	3	8	13	32
227	STN_LEFT_0	3.862968871	3.862968871	STN	0	0.009189316	left	7	-12.20776783	-12.57558516	-9.623361638	0	3	2	16	12	52
228	STN_LEFT_1	3.107270688	3.107270688	STN	0	0	left	7	-12.83912558	-11.13855835	-7.974409153	0.308696738	3	2	16	12	52
229	STN_LEFT_2	3.8410594	3.8410594	STN	0	0	left	7	-13.48495935	-9.700381215	-6.286550544	0	3	2	16	12	52
230	STN_LEFT_0	1.718723644	1.718723644	STN	0	0	left	8	-13.64378363	-14.57201671	-5.182910106	0.802519661	2	3	16	18	55
231	STN_LEFT_1	3.015361004	3.015361004	STN	0	0	left	8	-14.28235909	-13.49717627	-3.38267698	0.664125101	2	3	16	18	55
232	STN_LEFT_2	4.983833139	4.983833139	STN	0	0	left	8	-14.92093455	-12.42233584	-1.582443854	0	2	3	16	18	55
233	STN_LEFT_0	2.144964571	2.144964571	STN	0	0	left	9	-12.98156488	-14.7847171	-7.46680041	1.368416248	3	2	17.5	12	50
234	STN_LEFT_1	1.082703494	1.082703494	STN	0	0	left	9	-13.57567267	-13.82814988	-5.792324602	1.705230513	3	2	17.5	12	50
235	STN_LEFT_2	2.409412266	2.409412266	STN	0	0	left	9	-14.16675131	-12.88159445	-4.135561959	1.819150778	3	2	17.5	12	50
236	STN_LEFT_0	2.158096161	2.158096161	STN	0.004935897	0	left	10	-11.66579382	-12.61817999	-7.657352001	0.66805153	3	2	16	15	62
237	STN_LEFT_1	2.165884288	2.165884288	STN	0	0	left	10	-12.27619699	-11.27017431	-6.011083273	0.479588783	3	2	16	15	62
238	STN_LEFT_2	3.811109367	3.811109367	STN	0	0	left	10	-12.88660016	-9.922168626	-4.364814546	0.607526902	3	2	16	15	62
239	STN_RIGHT_0	7.385814401	7.385814401	STN	0	0	right	10	8.174996865	-15.06999531	-11.56127554	0	2	3	15	16	62
240	STN_RIGHT_1	5.619340949	5.619340949	STN	0	0	right	10	8.777505549	-13.77182014	-9.991542774	0	2	3	15	16	62
241	STN_RIGHT_2	4.198619294	4.198619294	STN	0	0	right	10	9.380014232	-12.47364496	-8.421810005	0	2	3	15	16	62
242	STN_LEFT_0	7.886691068	7.886691068	STN	0	0	left	13	-14.266	-18.68	-11.49	0.537624573	3	2	17	12	48
243	STN_LEFT_1	6.166393592	6.166393592	STN	0	0	left	13	-14.8883	-17.947	-9.3502	0	3	2	17	12	48
244	STN_LEFT_2	4.984299881	4.984299881	STN	0	0	left	13	-15.504	-17.2129	-7.2233	0	3	2	17	12	48
245	STN_RIGHT_0	3.085588947	3.085588947	STN	0	0	right	14	14.8129548	-14.13439076	-3.867494062	0	1	2	6	8	31
246	STN_RIGHT_1	4.695179562	4.695179562	STN	0	0	right	14	15.16417687	-13.05369838	-1.966182616	0.089446594	1	2	6	8	31
247	STN_RIGHT_2	6.656341878	6.656341878	STN	0	0	right	14	15.50933446	-11.93704921	-0.07721977	0.110836876	1	2	6	8	31
