# Supplementary material for: Electrocorticography is superior to subthalamic local field potentials for movement decoding in Parkinson’s disease
Source: eLife. 2022 May 27;11:e75126. doi: 10.7554/eLife.75126 (PMC9142148; doi:10.7554/eLife.75126)
Supplement: Figure 2—source data 1. [file elife-75126-fig2-data1.csv]

	Frequency bands	patient	Weights	loc	lat
0	$\theta$	0.0	-0.007070495071504332	ECOG	CON
1	$\alpha$	0.0	-0.011949046200323582	ECOG	CON
2	$l\beta$	0.0	-0.003281292411077979	ECOG	CON
3	$h\beta$	0.0	-0.03745087085214134	ECOG	CON
4	$a\beta$	0.0	0.0012647885824825945	ECOG	CON
5	$l\gamma$	0.0	0.13770602274033056	ECOG	CON
6	$HFA$	0.0	-0.019825950156633562	ECOG	CON
7	$a\gamma$	0.0	0.007289505544763723	ECOG	CON
8	$\theta$	1.0	0.0062197679786090585	ECOG	CON
9	$\alpha$	1.0	-0.015139479877532211	ECOG	CON
10	$l\beta$	1.0	0.003764463179952581	ECOG	CON
11	$h\beta$	1.0	-0.020944999935033442	ECOG	CON
12	$a\beta$	1.0	0.0024616132181680137	ECOG	CON
13	$l\gamma$	1.0	0.1395330974027145	ECOG	CON
14	$HFA$	1.0	0.042152202762573365	ECOG	CON
15	$a\gamma$	1.0	-0.025048103069489167	ECOG	CON
16	$\theta$	2.0	-0.039198270829536766	ECOG	CON
17	$\alpha$	2.0	-0.023997414638777588	ECOG	CON
18	$l\beta$	2.0	-0.0036471132512451224	ECOG	CON
19	$h\beta$	2.0	0.030528369333479573	ECOG	CON
20	$a\beta$	2.0	-0.011180775724232353	ECOG	CON
21	$l\gamma$	2.0	-0.006264113051214249	ECOG	CON
22	$HFA$	2.0	-0.003918332898892492	ECOG	CON
23	$a\gamma$	2.0	-0.012187721983480185	ECOG	CON
24	$\theta$	3.0	0.009891681793725272	ECOG	CON
25	$\alpha$	3.0	-0.00801695703887254	ECOG	CON
26	$l\beta$	3.0	-0.013099091393912387	ECOG	CON
27	$h\beta$	3.0	-0.03736493794654035	ECOG	CON
28	$a\beta$	3.0	-0.007935228064273233	ECOG	CON
29	$l\gamma$	3.0	0.03528128867992503	ECOG	CON
30	$HFA$	3.0	0.019295592876391224	ECOG	CON
31	$a\gamma$	3.0	-0.005998795652796508	ECOG	CON
32	$\theta$	4.0	-0.016036381566922605	ECOG	CON
33	$\alpha$	4.0	-0.01739018474134737	ECOG	CON
34	$l\beta$	4.0	-0.0038758036490966798	ECOG	CON
35	$h\beta$	4.0	-0.031422444750534524	ECOG	CON
36	$a\beta$	4.0	-0.006623168491176637	ECOG	CON
37	$l\gamma$	4.0	0.15117527157222466	ECOG	CON
38	$HFA$	4.0	-0.019900014747308688	ECOG	CON
39	$a\gamma$	4.0	-0.019610473607864623	ECOG	CON
40	$\theta$	5.0	-0.0061241279319602755	ECOG	CON
41	$\alpha$	5.0	-0.0028617302999011628	ECOG	CON
42	$l\beta$	5.0	-0.0011020238324781096	ECOG	CON
43	$h\beta$	5.0	-0.045654138057726765	ECOG	CON
44	$a\beta$	5.0	0.005407573602083437	ECOG	CON
45	$l\gamma$	5.0	0.05289046052687975	ECOG	CON
46	$HFA$	5.0	0.021891393359565924	ECOG	CON
47	$a\gamma$	5.0	-0.030218552535051388	ECOG	CON
48	$\theta$	6.0	0.01963735954432289	ECOG	CON
49	$\alpha$	6.0	0.015933650260146332	ECOG	CON
50	$l\beta$	6.0	-0.014075083557647215	ECOG	CON
51	$h\beta$	6.0	-0.01071721082185786	ECOG	CON
52	$a\beta$	6.0	-0.0055454391833053155	ECOG	CON
53	$l\gamma$	6.0	0.011841650374358127	ECOG	CON
54	$HFA$	6.0	0.013694697816447794	ECOG	CON
55	$a\gamma$	6.0	0.014994428935211166	ECOG	CON
56	$\theta$	7.0	0.0461809062582902	ECOG	CON
57	$\alpha$	7.0	0.00530998717992502	ECOG	CON
58	$l\beta$	7.0	-0.022056256386301543	ECOG	CON
59	$h\beta$	7.0	-0.02407760357227534	ECOG	CON
60	$a\beta$	7.0	-0.0018136549476477563	ECOG	CON
61	$l\gamma$	7.0	0.024184578362108106	ECOG	CON
62	$HFA$	7.0	0.004028585600697873	ECOG	CON
63	$a\gamma$	7.0	-0.005798806285149991	ECOG	CON
64	$\theta$	8.0	-0.016609113939084316	ECOG	CON
65	$\alpha$	8.0	0.0025087839691796485	ECOG	CON
66	$l\beta$	8.0	-0.0029558166565408117	ECOG	CON
67	$h\beta$	8.0	-0.053865270592866055	ECOG	CON
68	$a\beta$	8.0	0.0212595392185539	ECOG	CON
69	$l\gamma$	8.0	0.10679087681335497	ECOG	CON
70	$HFA$	8.0	0.029208697896069495	ECOG	CON
71	$a\gamma$	8.0	-0.006192551300221643	ECOG	CON
72	$\theta$	9.0	-0.009359018371541747	ECOG	CON
73	$\alpha$	9.0	-0.00963794688103215	ECOG	CON
74	$l\beta$	9.0	-0.027323711270125752	ECOG	CON
75	$h\beta$	9.0	-0.027987664827697125	ECOG	CON
76	$a\beta$	9.0	0.013965726436507567	ECOG	CON
77	$l\gamma$	9.0	0.05133909183247683	ECOG	CON
78	$HFA$	9.0	0.0012681699186593396	ECOG	CON
79	$a\gamma$	9.0	-0.01530528603835846	ECOG	CON
80	$\theta$	10.0	-0.04852381501319772	ECOG	CON
81	$\alpha$	10.0	-0.027950844870956587	ECOG	CON
82	$l\beta$	10.0	-0.025259328067522357	ECOG	CON
83	$h\beta$	10.0	-0.043988703915661787	ECOG	CON
84	$a\beta$	10.0	0.020712435442883752	ECOG	CON
85	$l\gamma$	10.0	-0.027790476673431968	ECOG	CON
86	$HFA$	10.0	-0.004168723300565621	ECOG	CON
87	$a\gamma$	10.0	0.00025865033148201374	ECOG	CON
88	$\theta$	0.0	-0.04103853356050275	ECOG	IPS
89	$\alpha$	0.0	-0.02596626896359402	ECOG	IPS
90	$l\beta$	0.0	-0.03663480795761084	ECOG	IPS
91	$h\beta$	0.0	-0.01240513282702117	ECOG	IPS
92	$a\beta$	0.0	0.014061414542760407	ECOG	IPS
93	$l\gamma$	0.0	-0.03689291452121177	ECOG	IPS
94	$HFA$	0.0	-0.01170276306118154	ECOG	IPS
95	$a\gamma$	0.0	0.0026107794711148842	ECOG	IPS
96	$\theta$	1.0	0.005222402845762029	ECOG	IPS
97	$\alpha$	1.0	-0.026845148750664287	ECOG	IPS
98	$l\beta$	1.0	-0.00989454979824976	ECOG	IPS
99	$h\beta$	1.0	-0.05535906973547999	ECOG	IPS
100	$a\beta$	1.0	0.017533922435197455	ECOG	IPS
101	$l\gamma$	1.0	0.044640504396679694	ECOG	IPS
102	$HFA$	1.0	0.0193893423537506	ECOG	IPS
103	$a\gamma$	1.0	0.0015311637416708212	ECOG	IPS
104	$\theta$	2.0	-0.020942610394012334	ECOG	IPS
105	$\alpha$	2.0	-0.008065174305715142	ECOG	IPS
106	$l\beta$	2.0	-0.03463483916474363	ECOG	IPS
107	$h\beta$	2.0	-0.040407098015869364	ECOG	IPS
108	$a\beta$	2.0	0.009099899174496072	ECOG	IPS
109	$l\gamma$	2.0	0.07344844434574398	ECOG	IPS
110	$HFA$	2.0	0.034604765211784794	ECOG	IPS
111	$a\gamma$	2.0	-0.016544385793063235	ECOG	IPS
112	$\theta$	3.0	-0.006346374017525641	ECOG	IPS
113	$\alpha$	3.0	-0.017984466049617145	ECOG	IPS
114	$l\beta$	3.0	-0.008700982678055426	ECOG	IPS
115	$h\beta$	3.0	-0.022883668183332775	ECOG	IPS
116	$a\beta$	3.0	0.0035267177563695525	ECOG	IPS
117	$l\gamma$	3.0	-0.007566504245811737	ECOG	IPS
118	$HFA$	3.0	0.0025224230328449097	ECOG	IPS
119	$a\gamma$	3.0	-0.015292906282920656	ECOG	IPS
120	$\theta$	4.0	-0.022840994347132066	ECOG	IPS
121	$\alpha$	4.0	-0.02686960912650476	ECOG	IPS
122	$l\beta$	4.0	0.01299393047542189	ECOG	IPS
123	$h\beta$	4.0	-0.009982422447145369	ECOG	IPS
124	$a\beta$	4.0	-0.014127908046260256	ECOG	IPS
125	$l\gamma$	4.0	-0.025751238506814114	ECOG	IPS
126	$HFA$	4.0	-0.010612439266859898	ECOG	IPS
127	$a\gamma$	4.0	0.004398109954937265	ECOG	IPS
128	$\theta$	5.0	-0.001457879198184633	ECOG	IPS
129	$\alpha$	5.0	0.0004300414612305528	ECOG	IPS
130	$l\beta$	5.0	-0.027411591473614695	ECOG	IPS
131	$h\beta$	5.0	-0.02519757350061316	ECOG	IPS
132	$a\beta$	5.0	0.010730516433906063	ECOG	IPS
133	$l\gamma$	5.0	0.04248096917389424	ECOG	IPS
134	$HFA$	5.0	0.007854682822284515	ECOG	IPS
135	$a\gamma$	5.0	-0.009297783740657064	ECOG	IPS
136	$\theta$	6.0	9.15530944941816e-05	ECOG	IPS
137	$\alpha$	6.0	-0.002027060411107359	ECOG	IPS
138	$l\beta$	6.0	-0.0016218530080994702	ECOG	IPS
139	$h\beta$	6.0	-0.005114104511042319	ECOG	IPS
140	$a\beta$	6.0	-0.0050141805139575155	ECOG	IPS
141	$l\gamma$	6.0	0.0018664859824727234	ECOG	IPS
142	$HFA$	6.0	-0.002714055438278761	ECOG	IPS
143	$a\gamma$	6.0	0.0003199212980186405	ECOG	IPS
144	$\theta$	7.0	0.027755819261826548	ECOG	IPS
145	$\alpha$	7.0	0.009120565459904893	ECOG	IPS
146	$l\beta$	7.0	-0.03137915200437818	ECOG	IPS
147	$h\beta$	7.0	-0.012282411324738805	ECOG	IPS
148	$a\beta$	7.0	0.004855511195249279	ECOG	IPS
149	$l\gamma$	7.0	0.007146402114291477	ECOG	IPS
150	$HFA$	7.0	0.01598533159266949	ECOG	IPS
151	$a\gamma$	7.0	-0.013590559215295233	ECOG	IPS
152	$\theta$	8.0	0.022326943504600096	ECOG	IPS
153	$\alpha$	8.0	0.008702350634102119	ECOG	IPS
154	$l\beta$	8.0	-0.012350817421051725	ECOG	IPS
155	$h\beta$	8.0	-0.03983262359160298	ECOG	IPS
156	$a\beta$	8.0	0.009079371066725456	ECOG	IPS
157	$l\gamma$	8.0	-0.03693807023302335	ECOG	IPS
158	$HFA$	8.0	-0.008250100782566851	ECOG	IPS
159	$a\gamma$	8.0	0.007729719813629252	ECOG	IPS
160	$\theta$	9.0	-0.0023934044994293607	ECOG	IPS
161	$\alpha$	9.0	-0.010887642347859631	ECOG	IPS
162	$l\beta$	9.0	-0.008829734254107165	ECOG	IPS
163	$h\beta$	9.0	-0.015601037218293073	ECOG	IPS
164	$a\beta$	9.0	-0.0019484351446797557	ECOG	IPS
165	$l\gamma$	9.0	0.0014152679810965655	ECOG	IPS
166	$HFA$	9.0	0.002999400868312898	ECOG	IPS
167	$a\gamma$	9.0	0.006792672814193861	ECOG	IPS
168	$\theta$	10.0	-0.03595792873117235	ECOG	IPS
169	$\alpha$	10.0	-0.04365381385769062	ECOG	IPS
170	$l\beta$	10.0	-0.0021634939606743585	ECOG	IPS
171	$h\beta$	10.0	-0.06329440469022272	ECOG	IPS
172	$a\beta$	10.0	0.020756503485112956	ECOG	IPS
173	$l\gamma$	10.0	0.047322307340670715	ECOG	IPS
174	$HFA$	10.0	0.004403732839082254	ECOG	IPS
175	$a\gamma$	10.0	-0.01132550837087869	ECOG	IPS
176	$\theta$	0.0	-0.025310283671310448	STN	CON
177	$\alpha$	0.0	-0.030779945561013378	STN	CON
178	$l\beta$	0.0	-0.03142663927063635	STN	CON
179	$h\beta$	0.0	-0.018198413350174338	STN	CON
180	$a\beta$	0.0	0.011356331516213765	STN	CON
181	$l\gamma$	0.0	0.23931471364898974	STN	CON
182	$HFA$	0.0	0.03577625024818274	STN	CON
183	$a\gamma$	0.0	-0.1170254988433585	STN	CON
184	$\theta$	1.0	0.02541598469113297	STN	CON
185	$\alpha$	1.0	-0.021480142587695344	STN	CON
186	$l\beta$	1.0	-0.01176126507355806	STN	CON
187	$h\beta$	1.0	-0.07042526177808786	STN	CON
188	$a\beta$	1.0	0.023379563193577656	STN	CON
189	$l\gamma$	1.0	0.04788373445319607	STN	CON
190	$HFA$	1.0	0.02328844385906048	STN	CON
191	$a\gamma$	1.0	0.028438592264947382	STN	CON
192	$\theta$	2.0	0.007390092257405694	STN	CON
193	$\alpha$	2.0	-0.03324311999530438	STN	CON
194	$l\beta$	2.0	0.07222789446374847	STN	CON
195	$h\beta$	2.0	0.06250224366611937	STN	CON
196	$a\beta$	2.0	-0.059945359040957893	STN	CON
197	$l\gamma$	2.0	0.013398158471093212	STN	CON
198	$HFA$	2.0	0.007594926987158397	STN	CON
199	$a\gamma$	2.0	-4.7563229978127286e-05	STN	CON
200	$\theta$	3.0	0.021808569134437124	STN	CON
201	$\alpha$	3.0	-0.009440262973519025	STN	CON
202	$l\beta$	3.0	-0.02145669600179905	STN	CON
203	$h\beta$	3.0	-0.03751302531507681	STN	CON
204	$a\beta$	3.0	-0.0027761893152634678	STN	CON
205	$l\gamma$	3.0	0.040655466693217165	STN	CON
206	$HFA$	3.0	-0.0005184155444602004	STN	CON
207	$a\gamma$	3.0	-0.010468689945264804	STN	CON
208	$\theta$	4.0	0.008342753575654402	STN	CON
209	$\alpha$	4.0	0.004741458311919026	STN	CON
210	$l\beta$	4.0	-0.038073504628138084	STN	CON
211	$h\beta$	4.0	-0.04791279928195839	STN	CON
212	$a\beta$	4.0	0.010687832466568783	STN	CON
213	$l\gamma$	4.0	0.045943271776170705	STN	CON
214	$HFA$	4.0	0.014079720278683866	STN	CON
215	$a\gamma$	4.0	-0.01716127921041116	STN	CON
216	$\theta$	5.0	-0.006054413303302026	STN	CON
217	$\alpha$	5.0	-0.0031747712029262585	STN	CON
218	$l\beta$	5.0	0.018497232613465184	STN	CON
219	$h\beta$	5.0	-0.012001800487392493	STN	CON
220	$a\beta$	5.0	-0.03333968375415041	STN	CON
221	$l\gamma$	5.0	0.0014996881662866256	STN	CON
222	$HFA$	5.0	0.03050530083432959	STN	CON
223	$a\gamma$	5.0	0.016670048953878618	STN	CON
224	$\theta$	6.0	0.0034001056010312097	STN	CON
225	$\alpha$	6.0	0.0009153657357233973	STN	CON
226	$l\beta$	6.0	-0.017791845012924495	STN	CON
227	$h\beta$	6.0	-0.018022644640971114	STN	CON
228	$a\beta$	6.0	0.009972890369777318	STN	CON
229	$l\gamma$	6.0	-0.0014530070647174587	STN	CON
230	$HFA$	6.0	-0.01162991671896646	STN	CON
231	$a\gamma$	6.0	0.026057107495831254	STN	CON
232	$\theta$	7.0	0.004295475566338366	STN	CON
233	$\alpha$	7.0	0.021284233514225624	STN	CON
234	$l\beta$	7.0	0.04505512883359845	STN	CON
235	$h\beta$	7.0	0.04001829428412	STN	CON
236	$a\beta$	7.0	-0.04430407257101848	STN	CON
237	$l\gamma$	7.0	0.030109977232227757	STN	CON
238	$HFA$	7.0	0.005814295040104937	STN	CON
239	$a\gamma$	7.0	-0.049153889005756395	STN	CON
240	$\theta$	8.0	0.016906073725467093	STN	CON
241	$\alpha$	8.0	0.05284349099550239	STN	CON
242	$l\beta$	8.0	-0.029423843102915306	STN	CON
243	$h\beta$	8.0	-0.05898332940151099	STN	CON
244	$a\beta$	8.0	0.05047328068889645	STN	CON
245	$l\gamma$	8.0	-0.006153902907470888	STN	CON
246	$HFA$	8.0	0.031515048308645585	STN	CON
247	$a\gamma$	8.0	-0.0637745389368973	STN	CON
248	$\theta$	9.0	0.04731561392150338	STN	CON
249	$\alpha$	9.0	0.017427337328298362	STN	CON
250	$l\beta$	9.0	-0.04262283602717978	STN	CON
251	$h\beta$	9.0	-0.007909946423544631	STN	CON
252	$a\beta$	9.0	0.027059910749574614	STN	CON
253	$l\gamma$	9.0	0.005939611949371907	STN	CON
254	$HFA$	9.0	0.014295280982077795	STN	CON
255	$a\gamma$	9.0	-0.018893913347654293	STN	CON
256	$\theta$	10.0	-0.01511386025076344	STN	CON
257	$\alpha$	10.0	-0.016095345787317007	STN	CON
258	$l\beta$	10.0	0.043276230168507374	STN	CON
259	$h\beta$	10.0	0.005297901609616604	STN	CON
260	$a\beta$	10.0	0.009022636797850963	STN	CON
261	$l\gamma$	10.0	0.031260698065713965	STN	CON
262	$HFA$	10.0	0.05933541983885181	STN	CON
263	$a\gamma$	10.0	-0.06769203195869025	STN	CON
264	$\theta$	0.0	-0.041396725351664665	STN	IPS
265	$\alpha$	0.0	-0.04153841562318982	STN	IPS
266	$l\beta$	0.0	-0.05011221903653193	STN	IPS
267	$h\beta$	0.0	-0.00022647281819446544	STN	IPS
268	$a\beta$	0.0	0.01596056057361022	STN	IPS
269	$l\gamma$	0.0	-0.013833561358804567	STN	IPS
270	$HFA$	0.0	0.024694284019029657	STN	IPS
271	$a\gamma$	0.0	-0.003266252629708727	STN	IPS
272	$\theta$	1.0	0.022898782925373323	STN	IPS
273	$\alpha$	1.0	-0.016013711331084306	STN	IPS
274	$l\beta$	1.0	-0.024668714207568703	STN	IPS
275	$h\beta$	1.0	-0.11102617157171396	STN	IPS
276	$a\beta$	1.0	0.06095001598161815	STN	IPS
277	$l\gamma$	1.0	-0.01644450888348884	STN	IPS
278	$HFA$	1.0	0.000987183920787572	STN	IPS
279	$a\gamma$	1.0	-0.006849716962134934	STN	IPS
280	$\theta$	2.0	0.007474361849789887	STN	IPS
281	$\alpha$	2.0	-0.02187921259975241	STN	IPS
282	$l\beta$	2.0	-0.06161067454490825	STN	IPS
283	$h\beta$	2.0	0.08369532922779549	STN	IPS
284	$a\beta$	2.0	0.03555382735408774	STN	IPS
285	$l\gamma$	2.0	0.005867723626528915	STN	IPS
286	$HFA$	2.0	0.0037938163975259048	STN	IPS
287	$a\gamma$	2.0	-0.01303868636863783	STN	IPS
288	$\theta$	3.0	0.021907620802545557	STN	IPS
289	$\alpha$	3.0	-0.022227749941884232	STN	IPS
290	$l\beta$	3.0	-0.017230235771905317	STN	IPS
291	$h\beta$	3.0	-0.010841995655755938	STN	IPS
292	$a\beta$	3.0	-0.02012806002232896	STN	IPS
293	$l\gamma$	3.0	0.02781038813518574	STN	IPS
294	$HFA$	3.0	0.0077614168768030505	STN	IPS
295	$a\gamma$	3.0	-0.022053588061235436	STN	IPS
296	$\theta$	4.0	-0.024317475076402435	STN	IPS
297	$\alpha$	4.0	-0.013186878338422121	STN	IPS
298	$l\beta$	4.0	-0.03521843604629198	STN	IPS
299	$h\beta$	4.0	-0.05185303367675837	STN	IPS
300	$a\beta$	4.0	0.010571125892460748	STN	IPS
301	$l\gamma$	4.0	0.0035209228456613857	STN	IPS
302	$HFA$	4.0	0.03474837999729731	STN	IPS
303	$a\gamma$	4.0	-0.002190174099725407	STN	IPS
304	$\theta$	5.0	-0.008432469875195123	STN	IPS
305	$\alpha$	5.0	0.0015526481776390435	STN	IPS
306	$l\beta$	5.0	-0.004458950121508796	STN	IPS
307	$h\beta$	5.0	-0.01704343562390036	STN	IPS
308	$a\beta$	5.0	-0.015482458869182621	STN	IPS
309	$l\gamma$	5.0	-0.03621557524309204	STN	IPS
310	$HFA$	5.0	0.051126609249188576	STN	IPS
311	$a\gamma$	5.0	0.03439762106451923	STN	IPS
312	$\theta$	6.0	0.0020369557777254995	STN	IPS
313	$\alpha$	6.0	0.0020137296507560395	STN	IPS
314	$l\beta$	6.0	-0.009379424718061741	STN	IPS
315	$h\beta$	6.0	-0.006960982604579651	STN	IPS
316	$a\beta$	6.0	0.0009211733565686273	STN	IPS
317	$l\gamma$	6.0	0.0036539726891724	STN	IPS
318	$HFA$	6.0	-0.0005589894666282105	STN	IPS
319	$a\gamma$	6.0	0.0007066972273341235	STN	IPS
320	$\theta$	7.0	0.029066938377614832	STN	IPS
321	$\alpha$	7.0	-0.0022218106614767513	STN	IPS
322	$l\beta$	7.0	0.04356719134259966	STN	IPS
323	$h\beta$	7.0	0.007405106396969995	STN	IPS
324	$a\beta$	7.0	-0.05095274294740177	STN	IPS
325	$l\gamma$	7.0	-0.018386459611435355	STN	IPS
326	$HFA$	7.0	-0.006827382530568072	STN	IPS
327	$a\gamma$	7.0	0.001302188242028025	STN	IPS
328	$\theta$	8.0	0.02690586315871024	STN	IPS
329	$\alpha$	8.0	0.0012378651759216057	STN	IPS
330	$l\beta$	8.0	0.017559731875791504	STN	IPS
331	$h\beta$	8.0	0.02600173537249965	STN	IPS
332	$a\beta$	8.0	-0.026670389725939492	STN	IPS
333	$l\gamma$	8.0	0.014214987777425686	STN	IPS
334	$HFA$	8.0	0.021393426780957164	STN	IPS
335	$a\gamma$	8.0	-0.021797453737127406	STN	IPS
336	$\theta$	9.0	-0.03207054447386893	STN	IPS
337	$\alpha$	9.0	0.013966502218503254	STN	IPS
338	$l\beta$	9.0	-0.018526436622084495	STN	IPS
339	$h\beta$	9.0	0.004838527209822089	STN	IPS
340	$a\beta$	9.0	0.0023651436760968514	STN	IPS
341	$l\gamma$	9.0	-0.015398559207848394	STN	IPS
342	$HFA$	9.0	-0.0005375028885460237	STN	IPS
343	$a\gamma$	9.0	0.008435655394354782	STN	IPS
344	$\theta$	10.0	0.015957925990778485	STN	IPS
345	$\alpha$	10.0	-0.006146394278722553	STN	IPS
346	$l\beta$	10.0	0.03380863261033265	STN	IPS
347	$h\beta$	10.0	-0.012315716686755384	STN	IPS
348	$a\beta$	10.0	-0.05281039339771464	STN	IPS
349	$l\gamma$	10.0	-0.013164682894827702	STN	IPS
350	$HFA$	10.0	-0.020990011098669735	STN	IPS
351	$a\gamma$	10.0	0.028460603145773724	STN	IPS
