# Supplementary material for: Electrocorticography is superior to subthalamic local field potentials for movement decoding in Parkinson’s disease
Source: eLife. 2022 May 27;11:e75126. doi: 10.7554/eLife.75126 (PMC9142148; doi:10.7554/eLife.75126)
Supplement: Figure 2—source data 3. [file elife-75126-fig2-data3.csv]

	$R^2$	Combined time lag [ms]	lat	loc	patient
0	0.33780448684939934	[-100-0]	CON	ECOG	0.0
1	0.3677733661510595	[-200-0]	CON	ECOG	0.0
2	0.3842185250642897	[-300-0]	CON	ECOG	0.0
3	0.40491325476705375	[-400-0]	CON	ECOG	0.0
4	0.41179437922447376	[-500-0]	CON	ECOG	0.0
5	0.41241741658335196	[-600-0]	CON	ECOG	0.0
6	0.4105820509601312	[-700-0]	CON	ECOG	0.0
7	0.29960658905683113	[-100-0]	CON	ECOG	1.0
8	0.34710904109843377	[-200-0]	CON	ECOG	1.0
9	0.3792159599490155	[-300-0]	CON	ECOG	1.0
10	0.396405365205842	[-400-0]	CON	ECOG	1.0
11	0.40530928194628724	[-500-0]	CON	ECOG	1.0
12	0.4115503417962677	[-600-0]	CON	ECOG	1.0
13	0.41814102440602846	[-700-0]	CON	ECOG	1.0
14	0.07235085395204019	[-100-0]	CON	ECOG	2.0
15	0.07587587611989492	[-200-0]	CON	ECOG	2.0
16	0.07858502603710413	[-300-0]	CON	ECOG	2.0
17	0.08010130844705503	[-400-0]	CON	ECOG	2.0
18	0.08378249242834176	[-500-0]	CON	ECOG	2.0
19	0.08613111728042015	[-600-0]	CON	ECOG	2.0
20	0.08870443025242118	[-700-0]	CON	ECOG	2.0
21	0.0825093915435459	[-100-0]	CON	ECOG	3.0
22	0.09872893378369896	[-200-0]	CON	ECOG	3.0
23	0.11771538536535793	[-300-0]	CON	ECOG	3.0
24	0.13209289326202917	[-400-0]	CON	ECOG	3.0
25	0.13655363199062234	[-500-0]	CON	ECOG	3.0
26	0.13741751017914475	[-600-0]	CON	ECOG	3.0
27	0.13886282670942027	[-700-0]	CON	ECOG	3.0
28	0.21757195834663098	[-100-0]	CON	ECOG	4.0
29	0.23715996155375238	[-200-0]	CON	ECOG	4.0
30	0.25011617073799985	[-300-0]	CON	ECOG	4.0
31	0.2577403576617622	[-400-0]	CON	ECOG	4.0
32	0.25917173170544267	[-500-0]	CON	ECOG	4.0
33	0.2589209556445365	[-600-0]	CON	ECOG	4.0
34	0.2588081071959653	[-700-0]	CON	ECOG	4.0
35	0.07067188545792576	[-100-0]	CON	ECOG	5.0
36	0.08770876162905024	[-200-0]	CON	ECOG	5.0
37	0.10461239494839707	[-300-0]	CON	ECOG	5.0
38	0.11464601468374566	[-400-0]	CON	ECOG	5.0
39	0.11652714047603852	[-500-0]	CON	ECOG	5.0
40	0.11412809663623888	[-600-0]	CON	ECOG	5.0
41	0.10974920494684792	[-700-0]	CON	ECOG	5.0
42	0.16297865959916086	[-100-0]	CON	ECOG	6.0
43	0.2076910025754756	[-200-0]	CON	ECOG	6.0
44	0.22634575936927687	[-300-0]	CON	ECOG	6.0
45	0.22806144601768855	[-400-0]	CON	ECOG	6.0
46	0.22922097052896176	[-500-0]	CON	ECOG	6.0
47	0.22958106177662532	[-600-0]	CON	ECOG	6.0
48	0.2287098259207133	[-700-0]	CON	ECOG	6.0
49	0.04403002312266384	[-100-0]	CON	ECOG	7.0
50	0.053624967926984235	[-200-0]	CON	ECOG	7.0
51	0.06327592142877785	[-300-0]	CON	ECOG	7.0
52	0.07080616606876769	[-400-0]	CON	ECOG	7.0
53	0.07441378352629935	[-500-0]	CON	ECOG	7.0
54	0.07658575574083167	[-600-0]	CON	ECOG	7.0
55	0.07865792940311793	[-700-0]	CON	ECOG	7.0
56	0.19329017192133585	[-100-0]	CON	ECOG	8.0
57	0.21899940582361524	[-200-0]	CON	ECOG	8.0
58	0.2357018430835723	[-300-0]	CON	ECOG	8.0
59	0.24601230528587817	[-400-0]	CON	ECOG	8.0
60	0.2515671208948248	[-500-0]	CON	ECOG	8.0
61	0.2554458635790632	[-600-0]	CON	ECOG	8.0
62	0.2591690460593317	[-700-0]	CON	ECOG	8.0
63	0.06283536539557166	[-100-0]	CON	ECOG	9.0
64	0.06558073342531649	[-200-0]	CON	ECOG	9.0
65	0.06909220179855118	[-300-0]	CON	ECOG	9.0
66	0.07110990037961411	[-400-0]	CON	ECOG	9.0
67	0.07273984421426083	[-500-0]	CON	ECOG	9.0
68	0.07678736481015318	[-600-0]	CON	ECOG	9.0
69	0.07935479335535538	[-700-0]	CON	ECOG	9.0
70	0.0574665007977635	[-100-0]	CON	ECOG	10.0
71	0.05847896333622051	[-200-0]	CON	ECOG	10.0
72	0.0589242021957201	[-300-0]	CON	ECOG	10.0
73	0.06153191343958249	[-400-0]	CON	ECOG	10.0
74	0.06531915609669618	[-500-0]	CON	ECOG	10.0
75	0.06834006190189572	[-600-0]	CON	ECOG	10.0
76	0.07209830381474727	[-700-0]	CON	ECOG	10.0
77	0.13773941023834022	[-100-0]	IPS	ECOG	0.0
78	0.14317279851329406	[-200-0]	IPS	ECOG	0.0
79	0.14616209822446513	[-300-0]	IPS	ECOG	0.0
80	0.14764027115210168	[-400-0]	IPS	ECOG	0.0
81	0.14888954720413136	[-500-0]	IPS	ECOG	0.0
82	0.14931631668760412	[-600-0]	IPS	ECOG	0.0
83	0.14956974480379476	[-700-0]	IPS	ECOG	0.0
84	0.0947314323329054	[-100-0]	IPS	ECOG	1.0
85	0.10400754928140096	[-200-0]	IPS	ECOG	1.0
86	0.11261548996316606	[-300-0]	IPS	ECOG	1.0
87	0.1201756835975087	[-400-0]	IPS	ECOG	1.0
88	0.12570298793795362	[-500-0]	IPS	ECOG	1.0
89	0.128645285839275	[-600-0]	IPS	ECOG	1.0
90	0.12849606259891766	[-700-0]	IPS	ECOG	1.0
91	0.12344665195255138	[-100-0]	IPS	ECOG	2.0
92	0.15970981631807063	[-200-0]	IPS	ECOG	2.0
93	0.19419837746779847	[-300-0]	IPS	ECOG	2.0
94	0.22168150465519926	[-400-0]	IPS	ECOG	2.0
95	0.23923147307906706	[-500-0]	IPS	ECOG	2.0
96	0.24861153298903976	[-600-0]	IPS	ECOG	2.0
97	0.2510201296662661	[-700-0]	IPS	ECOG	2.0
98	0.07615919347137501	[-100-0]	IPS	ECOG	3.0
99	0.07799092095556251	[-200-0]	IPS	ECOG	3.0
100	0.07953989570420868	[-300-0]	IPS	ECOG	3.0
101	0.08216440546870278	[-400-0]	IPS	ECOG	3.0
102	0.08473845196637227	[-500-0]	IPS	ECOG	3.0
103	0.087309047658331	[-600-0]	IPS	ECOG	3.0
104	0.08955147329707322	[-700-0]	IPS	ECOG	3.0
105	0.04742264237037517	[-100-0]	IPS	ECOG	4.0
106	0.048074174669553195	[-200-0]	IPS	ECOG	4.0
107	0.04916953251509566	[-300-0]	IPS	ECOG	4.0
108	0.05002606576539988	[-400-0]	IPS	ECOG	4.0
109	0.05225523671593193	[-500-0]	IPS	ECOG	4.0
110	0.055303228699099004	[-600-0]	IPS	ECOG	4.0
111	0.05841111271420585	[-700-0]	IPS	ECOG	4.0
112	0.03928969022479663	[-100-0]	IPS	ECOG	5.0
113	0.0442249551199877	[-200-0]	IPS	ECOG	5.0
114	0.04832455662496993	[-300-0]	IPS	ECOG	5.0
115	0.052928077099640716	[-400-0]	IPS	ECOG	5.0
116	0.05282232699290834	[-500-0]	IPS	ECOG	5.0
117	0.05220283699578976	[-600-0]	IPS	ECOG	5.0
118	0.05161695795708685	[-700-0]	IPS	ECOG	5.0
119	0.016833625696814347	[-100-0]	IPS	ECOG	6.0
120	0.016413165663640195	[-200-0]	IPS	ECOG	6.0
121	0.018902659502087426	[-300-0]	IPS	ECOG	6.0
122	0.019076137204188236	[-400-0]	IPS	ECOG	6.0
123	0.016882046946131313	[-500-0]	IPS	ECOG	6.0
124	0.01297046773588908	[-600-0]	IPS	ECOG	6.0
125	0.010470630012514892	[-700-0]	IPS	ECOG	6.0
126	0.030261145508142073	[-100-0]	IPS	ECOG	7.0
127	0.03731392614875417	[-200-0]	IPS	ECOG	7.0
128	0.04361945170334334	[-300-0]	IPS	ECOG	7.0
129	0.04871227862013736	[-400-0]	IPS	ECOG	7.0
130	0.0535021907493556	[-500-0]	IPS	ECOG	7.0
131	0.05741096665908378	[-600-0]	IPS	ECOG	7.0
132	0.06080764041289153	[-700-0]	IPS	ECOG	7.0
133	0.03771605917066476	[-100-0]	IPS	ECOG	8.0
134	0.04405616711090934	[-200-0]	IPS	ECOG	8.0
135	0.0493304039197104	[-300-0]	IPS	ECOG	8.0
136	0.053109439268276895	[-400-0]	IPS	ECOG	8.0
137	0.05711037749362935	[-500-0]	IPS	ECOG	8.0
138	0.061800448107925246	[-600-0]	IPS	ECOG	8.0
139	0.06656864514340292	[-700-0]	IPS	ECOG	8.0
140	0.0061034643572081436	[-100-0]	IPS	ECOG	9.0
141	0.003580298865101028	[-200-0]	IPS	ECOG	9.0
142	0.0005530951088532632	[-300-0]	IPS	ECOG	9.0
143	0.0	[-400-0]	IPS	ECOG	9.0
144	0.0	[-500-0]	IPS	ECOG	9.0
145	0.0	[-600-0]	IPS	ECOG	9.0
146	0.0	[-700-0]	IPS	ECOG	9.0
147	0.07136026684251337	[-100-0]	IPS	ECOG	10.0
148	0.0741592735733162	[-200-0]	IPS	ECOG	10.0
149	0.07755684910209655	[-300-0]	IPS	ECOG	10.0
150	0.07934357716345228	[-400-0]	IPS	ECOG	10.0
151	0.08345320720960905	[-500-0]	IPS	ECOG	10.0
152	0.08725230269422932	[-600-0]	IPS	ECOG	10.0
153	0.08963931819221951	[-700-0]	IPS	ECOG	10.0
154	0.38818139329070545	[-100-0]	CON	STN	0.0
155	0.4492617480289295	[-200-0]	CON	STN	0.0
156	0.49538027181106514	[-300-0]	CON	STN	0.0
157	0.5286963533635375	[-400-0]	CON	STN	0.0
158	0.5449763681630075	[-500-0]	CON	STN	0.0
159	0.5512444720278974	[-600-0]	CON	STN	0.0
160	0.5520438094208198	[-700-0]	CON	STN	0.0
161	0.07990985209692503	[-100-0]	CON	STN	1.0
162	0.09496116610416316	[-200-0]	CON	STN	1.0
163	0.10908505793172141	[-300-0]	CON	STN	1.0
164	0.11797848020078852	[-400-0]	CON	STN	1.0
165	0.1207874225701917	[-500-0]	CON	STN	1.0
166	0.12272526154353372	[-600-0]	CON	STN	1.0
167	0.12155862208840604	[-700-0]	CON	STN	1.0
168	0.07786110443943235	[-100-0]	CON	STN	2.0
169	0.0935494447024777	[-200-0]	CON	STN	2.0
170	0.10814434532823954	[-300-0]	CON	STN	2.0
171	0.12004007259204415	[-400-0]	CON	STN	2.0
172	0.1265767539882073	[-500-0]	CON	STN	2.0
173	0.12988665376471778	[-600-0]	CON	STN	2.0
174	0.13123247997088874	[-700-0]	CON	STN	2.0
175	0.08784671082558053	[-100-0]	CON	STN	3.0
176	0.08945080006517143	[-200-0]	CON	STN	3.0
177	0.09103834766882608	[-300-0]	CON	STN	3.0
178	0.09092228402693983	[-400-0]	CON	STN	3.0
179	0.09080552059202071	[-500-0]	CON	STN	3.0
180	0.08902385400898141	[-600-0]	CON	STN	3.0
181	0.08641100573035702	[-700-0]	CON	STN	3.0
182	0.008452898212857708	[-100-0]	CON	STN	4.0
183	0.008104674634085174	[-200-0]	CON	STN	4.0
184	0.005435771311853266	[-300-0]	CON	STN	4.0
185	0.0013614449188166233	[-400-0]	CON	STN	4.0
186	0.0	[-500-0]	CON	STN	4.0
187	0.0	[-600-0]	CON	STN	4.0
188	0.0	[-700-0]	CON	STN	4.0
189	0.002914604175966784	[-100-0]	CON	STN	5.0
190	0.0006907798263867005	[-200-0]	CON	STN	5.0
191	0.0	[-300-0]	CON	STN	5.0
192	0.0	[-400-0]	CON	STN	5.0
193	0.0	[-500-0]	CON	STN	5.0
194	0.0	[-600-0]	CON	STN	5.0
195	0.0	[-700-0]	CON	STN	5.0
196	0.015021077174895781	[-100-0]	CON	STN	6.0
197	0.014353604788562712	[-200-0]	CON	STN	6.0
198	0.012322920286498996	[-300-0]	CON	STN	6.0
199	0.0072454317305711505	[-400-0]	CON	STN	6.0
200	0.0031225607053609215	[-500-0]	CON	STN	6.0
201	0.0	[-600-0]	CON	STN	6.0
202	0.0	[-700-0]	CON	STN	6.0
203	0.0	[-100-0]	CON	STN	7.0
204	0.0	[-200-0]	CON	STN	7.0
205	0.0	[-300-0]	CON	STN	7.0
206	0.0	[-400-0]	CON	STN	7.0
207	0.0	[-500-0]	CON	STN	7.0
208	0.0	[-600-0]	CON	STN	7.0
209	0.0	[-700-0]	CON	STN	7.0
210	0.04649270303127946	[-100-0]	CON	STN	8.0
211	0.04642948785302725	[-200-0]	CON	STN	8.0
212	0.04407569980176955	[-300-0]	CON	STN	8.0
213	0.040974031906156935	[-400-0]	CON	STN	8.0
214	0.03636717941365035	[-500-0]	CON	STN	8.0
215	0.03324174309489005	[-600-0]	CON	STN	8.0
216	0.03195626664101545	[-700-0]	CON	STN	8.0
217	0.0	[-100-0]	CON	STN	9.0
218	0.0	[-200-0]	CON	STN	9.0
219	0.0	[-300-0]	CON	STN	9.0
220	0.00013594951636990426	[-400-0]	CON	STN	9.0
221	0.006156951285668777	[-500-0]	CON	STN	9.0
222	0.011144159272956955	[-600-0]	CON	STN	9.0
223	0.013969405803447521	[-700-0]	CON	STN	9.0
224	0.0	[-100-0]	CON	STN	10.0
225	0.0	[-200-0]	CON	STN	10.0
226	0.0	[-300-0]	CON	STN	10.0
227	0.0	[-400-0]	CON	STN	10.0
228	0.0	[-500-0]	CON	STN	10.0
229	0.0	[-600-0]	CON	STN	10.0
230	0.0	[-700-0]	CON	STN	10.0
231	0.058698251075114706	[-100-0]	IPS	STN	0.0
232	0.06442839844881813	[-200-0]	IPS	STN	0.0
233	0.06643722877986	[-300-0]	IPS	STN	0.0
234	0.06577747897555557	[-400-0]	IPS	STN	0.0
235	0.06516851858226616	[-500-0]	IPS	STN	0.0
236	0.06613015192989762	[-600-0]	IPS	STN	0.0
237	0.0658232900859824	[-700-0]	IPS	STN	0.0
238	0.06818547130279602	[-100-0]	IPS	STN	1.0
239	0.08063212374972709	[-200-0]	IPS	STN	1.0
240	0.09100091247962423	[-300-0]	IPS	STN	1.0
241	0.09986966479353399	[-400-0]	IPS	STN	1.0
242	0.10368155323915489	[-500-0]	IPS	STN	1.0
243	0.10497426522496342	[-600-0]	IPS	STN	1.0
244	0.10364824557108651	[-700-0]	IPS	STN	1.0
245	0.11388270403984582	[-100-0]	IPS	STN	2.0
246	0.14454219174871613	[-200-0]	IPS	STN	2.0
247	0.18926166968564312	[-300-0]	IPS	STN	2.0
248	0.23330544567382488	[-400-0]	IPS	STN	2.0
249	0.24739392772273852	[-500-0]	IPS	STN	2.0
250	0.24683647816433202	[-600-0]	IPS	STN	2.0
251	0.2436647601565797	[-700-0]	IPS	STN	2.0
252	0.058244000531939434	[-100-0]	IPS	STN	3.0
253	0.057081685856643194	[-200-0]	IPS	STN	3.0
254	0.05553828574905508	[-300-0]	IPS	STN	3.0
255	0.05389412647749743	[-400-0]	IPS	STN	3.0
256	0.0526131181834681	[-500-0]	IPS	STN	3.0
257	0.054435812700111844	[-600-0]	IPS	STN	3.0
258	0.05618790849462567	[-700-0]	IPS	STN	3.0
259	0.022133985281984937	[-100-0]	IPS	STN	4.0
260	0.026426198907177567	[-200-0]	IPS	STN	4.0
261	0.0275785341455429	[-300-0]	IPS	STN	4.0
262	0.02722106705439604	[-400-0]	IPS	STN	4.0
263	0.027621705474876655	[-500-0]	IPS	STN	4.0
264	0.028113247758214777	[-600-0]	IPS	STN	4.0
265	0.028611910743452595	[-700-0]	IPS	STN	4.0
266	0.04975878757386065	[-100-0]	IPS	STN	5.0
267	0.0631397701273396	[-200-0]	IPS	STN	5.0
268	0.06623512461175432	[-300-0]	IPS	STN	5.0
269	0.062267306744643355	[-400-0]	IPS	STN	5.0
270	0.05771917089595955	[-500-0]	IPS	STN	5.0
271	0.05317736991407844	[-600-0]	IPS	STN	5.0
272	0.0518703018291685	[-700-0]	IPS	STN	5.0
273	0.0036955982473618532	[-100-0]	IPS	STN	6.0
274	0.0	[-200-0]	IPS	STN	6.0
275	0.0	[-300-0]	IPS	STN	6.0
276	0.0	[-400-0]	IPS	STN	6.0
277	0.0	[-500-0]	IPS	STN	6.0
278	0.0	[-600-0]	IPS	STN	6.0
279	0.0	[-700-0]	IPS	STN	6.0
280	0.0	[-100-0]	IPS	STN	7.0
281	0.0	[-200-0]	IPS	STN	7.0
282	0.0	[-300-0]	IPS	STN	7.0
283	0.0	[-400-0]	IPS	STN	7.0
284	0.0	[-500-0]	IPS	STN	7.0
285	0.0	[-600-0]	IPS	STN	7.0
286	0.0	[-700-0]	IPS	STN	7.0
287	0.014043353184343488	[-100-0]	IPS	STN	8.0
288	0.01207059311907548	[-200-0]	IPS	STN	8.0
289	0.009316331777493025	[-300-0]	IPS	STN	8.0
290	0.007324144750500939	[-400-0]	IPS	STN	8.0
291	0.003304690357044904	[-500-0]	IPS	STN	8.0
292	0.0	[-600-0]	IPS	STN	8.0
293	0.0	[-700-0]	IPS	STN	8.0
294	0.0	[-100-0]	IPS	STN	9.0
295	0.0	[-200-0]	IPS	STN	9.0
296	0.0	[-300-0]	IPS	STN	9.0
297	0.0	[-400-0]	IPS	STN	9.0
298	0.0	[-500-0]	IPS	STN	9.0
299	0.0	[-600-0]	IPS	STN	9.0
300	0.0	[-700-0]	IPS	STN	9.0
301	0.0	[-100-0]	IPS	STN	10.0
302	0.0	[-200-0]	IPS	STN	10.0
303	0.0	[-300-0]	IPS	STN	10.0
304	0.0	[-400-0]	IPS	STN	10.0
305	0.0	[-500-0]	IPS	STN	10.0
306	0.0	[-600-0]	IPS	STN	10.0
307	0.0	[-700-0]	IPS	STN	10.0
