# Supplementary material for: Electrocorticography is superior to subthalamic local field potentials for movement decoding in Parkinson’s disease
Source: eLife. 2022 May 27;11:e75126. doi: 10.7554/eLife.75126 (PMC9142148; doi:10.7554/eLife.75126)
Supplement: Figure 3—source data 1. [file elife-75126-fig3-data1.csv]

	$R^2$	lat	loc	method	sub
0	0.7117344802831888	CON	ECOG	XGB	000
1	0.5947126601197517	CON	ECOG	SPOC_XGB	000
2	0.4232903696276968	CON	ECOG	SPOC_LM	000
3	0.4328505314308104	CON	ECOG	WF	000
4	0.8152601058707032	CON	ECOG	NN	000
5	0.33780448684939934	CON	ECOG	LM	000
6	0.6442713602966427	CON	ECOG	XGB	001
7	0.5987739900215029	CON	ECOG	SPOC_XGB	001
8	0.32216544103987327	CON	ECOG	SPOC_LM	001
9	0.4155144925246008	CON	ECOG	WF	001
10	0.22013338900489898	CON	ECOG	NN	001
11	0.29960658905683113	CON	ECOG	LM	001
12	0.1632165067755941	CON	ECOG	XGB	004
13	0.19169977987289086	CON	ECOG	SPOC_XGB	004
14	0.10428059587363474	CON	ECOG	SPOC_LM	004
15	0.08435690083092713	CON	ECOG	WF	004
16	0.0	CON	ECOG	NN	004
17	0.07235085395204019	CON	ECOG	LM	004
18	0.3720525702186854	CON	ECOG	XGB	005
19	0.07298811368173057	CON	ECOG	SPOC_XGB	005
20	0.09796394298947946	CON	ECOG	SPOC_LM	005
21	0.14604837152988284	CON	ECOG	WF	005
22	0.0	CON	ECOG	NN	005
23	0.0825093915435459	CON	ECOG	LM	005
24	0.3659363475272668	CON	ECOG	XGB	006
25	0.3884432889753466	CON	ECOG	SPOC_XGB	006
26	0.27484351106050514	CON	ECOG	SPOC_LM	006
27	0.24448668772005525	CON	ECOG	WF	006
28	0.11659125521668534	CON	ECOG	NN	006
29	0.21757195834663098	CON	ECOG	LM	006
30	0.041649815353668296	CON	ECOG	XGB	007
31	0.09926747820227722	CON	ECOG	SPOC_XGB	007
32	0.08237045330300241	CON	ECOG	SPOC_LM	007
33	0.12155197600602759	CON	ECOG	WF	007
34	0.0	CON	ECOG	NN	007
35	0.07067188545792576	CON	ECOG	LM	007
36	0.4422350160945297	CON	ECOG	XGB	008
37	0.3442649991574494	CON	ECOG	SPOC_XGB	008
38	0.2075351615106957	CON	ECOG	SPOC_LM	008
39	0.2398016231911458	CON	ECOG	WF	008
40	0.4020390059983616	CON	ECOG	NN	008
41	0.16297865959916086	CON	ECOG	LM	008
42	0.06153965276393462	CON	ECOG	XGB	009
43	0.05960350386118048	CON	ECOG	SPOC_XGB	009
44	0.08486862374225534	CON	ECOG	SPOC_LM	009
45	0.08941401600862953	CON	ECOG	WF	009
46	0.0	CON	ECOG	NN	009
47	0.04403002312266384	CON	ECOG	LM	009
48	0.3922820851548032	CON	ECOG	XGB	010
49	0.16863388394296783	CON	ECOG	SPOC_XGB	010
50	0.12356735642768694	CON	ECOG	SPOC_LM	010
51	0.24436676733452736	CON	ECOG	WF	010
52	0.0	CON	ECOG	NN	010
53	0.19329017192133585	CON	ECOG	LM	010
54	0.1112057091688039	CON	ECOG	XGB	013
55	0.014055798000873235	CON	ECOG	SPOC_XGB	013
56	0.012583147922865487	CON	ECOG	SPOC_LM	013
57	0.05859145739194804	CON	ECOG	WF	013
58	0.0	CON	ECOG	NN	013
59	0.06283536539557166	CON	ECOG	LM	013
60	0.062357807997492465	CON	ECOG	XGB	014
61	0.061423963921672375	CON	ECOG	SPOC_XGB	014
62	0.0629434428013107	CON	ECOG	SPOC_LM	014
63	0.050317851329705676	CON	ECOG	WF	014
64	0.0	CON	ECOG	NN	014
65	0.0574665007977635	CON	ECOG	LM	014
66	0.4189736154745424	IPS	ECOG	XGB	000
67	0.3218769348754201	IPS	ECOG	SPOC_XGB	000
68	0.23005719005163974	IPS	ECOG	SPOC_LM	000
69	0.16607398665936235	IPS	ECOG	WF	000
70	0.614075999182186	IPS	ECOG	NN	000
71	0.13773941023834022	IPS	ECOG	LM	000
72	0.21977460958764564	IPS	ECOG	XGB	001
73	0.04025895533590721	IPS	ECOG	SPOC_XGB	001
74	0.06704569451893409	IPS	ECOG	SPOC_LM	001
75	0.11951637759598603	IPS	ECOG	WF	001
76	0.0	IPS	ECOG	NN	001
77	0.0947314323329054	IPS	ECOG	LM	001
78	0.4001028939674877	IPS	ECOG	XGB	004
79	0.4193287695010504	IPS	ECOG	SPOC_XGB	004
80	0.24022609852071639	IPS	ECOG	SPOC_LM	004
81	0.2567120019725908	IPS	ECOG	WF	004
82	0.3453203484902524	IPS	ECOG	NN	004
83	0.12344665195255138	IPS	ECOG	LM	004
84	0.19501935859256614	IPS	ECOG	XGB	005
85	0.019602729944113533	IPS	ECOG	SPOC_XGB	005
86	0.05919176890214228	IPS	ECOG	SPOC_LM	005
87	0.08246981542586422	IPS	ECOG	WF	005
88	0.0	IPS	ECOG	NN	005
89	0.07615919347137501	IPS	ECOG	LM	005
90	0.11548138672032782	IPS	ECOG	XGB	006
91	0.048965308978668166	IPS	ECOG	SPOC_XGB	006
92	0.06441211577791812	IPS	ECOG	SPOC_LM	006
93	0.07953084395585235	IPS	ECOG	WF	006
94	0.0	IPS	ECOG	NN	006
95	0.04742264237037517	IPS	ECOG	LM	006
96	0.012180813497313666	IPS	ECOG	XGB	007
97	0.027796133171144155	IPS	ECOG	SPOC_XGB	007
98	0.07736484021175738	IPS	ECOG	SPOC_LM	007
99	0.0685678848344274	IPS	ECOG	WF	007
100	0.0	IPS	ECOG	NN	007
101	0.03928969022479663	IPS	ECOG	LM	007
102	0.011046882209954015	IPS	ECOG	XGB	008
103	0.003027673258654051	IPS	ECOG	SPOC_XGB	008
104	0.0266028328068361	IPS	ECOG	SPOC_LM	008
105	0.03261331271718967	IPS	ECOG	WF	008
106	0.0	IPS	ECOG	NN	008
107	0.016833625696814347	IPS	ECOG	LM	008
108	0.010650696435884047	IPS	ECOG	XGB	009
109	0.014526850859110726	IPS	ECOG	SPOC_XGB	009
110	0.070208154171763	IPS	ECOG	SPOC_LM	009
111	0.053498076370742664	IPS	ECOG	WF	009
112	0.0	IPS	ECOG	NN	009
113	0.030261145508142073	IPS	ECOG	LM	009
114	0.044818689425858094	IPS	ECOG	XGB	010
115	0.03151255557165844	IPS	ECOG	SPOC_XGB	010
116	0.05869605921023113	IPS	ECOG	SPOC_LM	010
117	0.05365616060588466	IPS	ECOG	WF	010
118	0.0	IPS	ECOG	NN	010
119	0.03771605917066476	IPS	ECOG	LM	010
120	0.003040332367071722	IPS	ECOG	XGB	013
121	0.0	IPS	ECOG	SPOC_XGB	013
122	0.0	IPS	ECOG	SPOC_LM	013
123	0.012669838049120438	IPS	ECOG	WF	013
124	0.0	IPS	ECOG	NN	013
125	0.0061034643572081436	IPS	ECOG	LM	013
126	0.0500322280582565	IPS	ECOG	XGB	014
127	0.028676138872009444	IPS	ECOG	SPOC_XGB	014
128	0.0471067741133873	IPS	ECOG	SPOC_LM	014
129	0.055890254713112784	IPS	ECOG	WF	014
130	0.0	IPS	ECOG	NN	014
131	0.07136026684251337	IPS	ECOG	LM	014
132	0.681787244398052	CON	STN	XGB	000
133	0.7037422636575764	CON	STN	SPOC_XGB	000
134	0.580363534108129	CON	STN	SPOC_LM	000
135	0.5940656892327414	CON	STN	WF	000
136	0.1653249708364768	CON	STN	NN	000
137	0.38818139329070545	CON	STN	LM	000
138	0.055689344295444	CON	STN	XGB	001
139	0.06767780501989344	CON	STN	SPOC_XGB	001
140	0.09339560900599626	CON	STN	SPOC_LM	001
141	0.11596989016366148	CON	STN	WF	001
142	0.0	CON	STN	NN	001
143	0.07990985209692503	CON	STN	LM	001
144	0.08810010529828098	CON	STN	XGB	004
145	0.12179421415689773	CON	STN	SPOC_XGB	004
146	0.12381875246488953	CON	STN	SPOC_LM	004
147	0.12080127483315284	CON	STN	WF	004
148	0.0	CON	STN	NN	004
149	0.07786110443943235	CON	STN	LM	004
150	0.1984691570481515	CON	STN	XGB	005
151	0.023853666269227285	CON	STN	SPOC_XGB	005
152	0.06510255048106943	CON	STN	SPOC_LM	005
153	0.09578458183052878	CON	STN	WF	005
154	0.0	CON	STN	NN	005
155	0.08784671082558053	CON	STN	LM	005
156	0.009458983582882885	CON	STN	XGB	006
157	0.10469124594931574	CON	STN	SPOC_XGB	006
158	0.1192464151703186	CON	STN	SPOC_LM	006
159	0.07347567721003496	CON	STN	WF	006
160	0.0	CON	STN	NN	006
161	0.008452898212857708	CON	STN	LM	006
162	0.0	CON	STN	XGB	007
163	0.0	CON	STN	SPOC_XGB	007
164	0.0	CON	STN	SPOC_LM	007
165	0.018528393559529843	CON	STN	WF	007
166	0.0	CON	STN	NN	007
167	0.002914604175966784	CON	STN	LM	007
168	0.0	CON	STN	XGB	008
169	0.0	CON	STN	SPOC_XGB	008
170	0.02507684546513707	CON	STN	SPOC_LM	008
171	0.0179390141610876	CON	STN	WF	008
172	0.0	CON	STN	NN	008
173	0.015021077174895781	CON	STN	LM	008
174	0.0	CON	STN	XGB	009
175	0.0	CON	STN	SPOC_XGB	009
176	0.0	CON	STN	SPOC_LM	009
177	0.0	CON	STN	WF	009
178	0.0	CON	STN	NN	009
179	0.0	CON	STN	LM	009
180	0.004935896695901591	CON	STN	XGB	010
181	0.01143207797491493	CON	STN	SPOC_XGB	010
182	0.00850962697497959	CON	STN	SPOC_LM	010
183	0.0447850156724419	CON	STN	WF	010
184	0.0	CON	STN	NN	010
185	0.04649270303127946	CON	STN	LM	010
186	0.0	CON	STN	XGB	013
187	0.0	CON	STN	SPOC_XGB	013
188	0.003996507674014716	CON	STN	SPOC_LM	013
189	0.015933583668116147	CON	STN	WF	013
190	0.0	CON	STN	NN	013
191	0.0	CON	STN	LM	013
192	0.0	CON	STN	XGB	014
193	0.0	CON	STN	SPOC_XGB	014
194	0.0	CON	STN	SPOC_LM	014
195	0.001758804675303945	CON	STN	WF	014
196	0.0	CON	STN	NN	014
197	0.0	CON	STN	LM	014
198	0.10903570160538889	IPS	STN	XGB	000
199	0.12114620914128944	IPS	STN	SPOC_XGB	000
200	0.1361566633712702	IPS	STN	SPOC_LM	000
201	0.09422891182967608	IPS	STN	WF	000
202	0.0	IPS	STN	NN	000
203	0.058698251075114706	IPS	STN	LM	000
204	0.15218882519776344	IPS	STN	XGB	001
205	0.04242896242272313	IPS	STN	SPOC_XGB	001
206	0.1227205442955734	IPS	STN	SPOC_LM	001
207	0.10752668637492298	IPS	STN	WF	001
208	0.0	IPS	STN	NN	001
209	0.06818547130279602	IPS	STN	LM	001
210	0.3588384105956555	IPS	STN	XGB	004
211	0.40988348734793423	IPS	STN	SPOC_XGB	004
212	0.21809090371867343	IPS	STN	SPOC_LM	004
213	0.32015565445117544	IPS	STN	WF	004
214	0.0	IPS	STN	NN	004
215	0.11388270403984582	IPS	STN	LM	004
216	0.06068719948861312	IPS	STN	XGB	005
217	0.0	IPS	STN	SPOC_XGB	005
218	0.027111754938435057	IPS	STN	SPOC_LM	005
219	0.05894455722976152	IPS	STN	WF	005
220	0.0	IPS	STN	NN	005
221	0.058244000531939434	IPS	STN	LM	005
222	0.032613810983751046	IPS	STN	XGB	006
223	0.01656151094888118	IPS	STN	SPOC_XGB	006
224	0.039084005740616025	IPS	STN	SPOC_LM	006
225	0.05414393738914277	IPS	STN	WF	006
226	0.0	IPS	STN	NN	006
227	0.022133985281984937	IPS	STN	LM	006
228	0.009189316020519126	IPS	STN	XGB	007
229	0.0027186557577663084	IPS	STN	SPOC_XGB	007
230	0.02001489651383929	IPS	STN	SPOC_LM	007
231	0.05851406294737179	IPS	STN	WF	007
232	0.0	IPS	STN	NN	007
233	0.04975878757386065	IPS	STN	LM	007
234	0.0	IPS	STN	XGB	008
235	0.0	IPS	STN	SPOC_XGB	008
236	0.003703523756003172	IPS	STN	SPOC_LM	008
237	0.003153998100173916	IPS	STN	WF	008
238	0.0	IPS	STN	NN	008
239	0.0036955982473618532	IPS	STN	LM	008
240	0.0	IPS	STN	XGB	009
241	0.0	IPS	STN	SPOC_XGB	009
242	0.0	IPS	STN	SPOC_LM	009
243	0.005873654796124598	IPS	STN	WF	009
244	0.0	IPS	STN	NN	009
245	0.0	IPS	STN	LM	009
246	0.0	IPS	STN	XGB	010
247	0.0	IPS	STN	SPOC_XGB	010
248	0.03440874068908639	IPS	STN	SPOC_LM	010
249	0.03512620031934451	IPS	STN	WF	010
250	0.0	IPS	STN	NN	010
251	0.014043353184343488	IPS	STN	LM	010
252	0.0	IPS	STN	XGB	013
253	0.0	IPS	STN	SPOC_XGB	013
254	0.0	IPS	STN	SPOC_LM	013
255	0.00212433718974403	IPS	STN	WF	013
256	0.0	IPS	STN	NN	013
257	0.0	IPS	STN	LM	013
258	0.0	IPS	STN	XGB	014
259	0.0	IPS	STN	SPOC_XGB	014
260	0.0	IPS	STN	SPOC_LM	014
261	0.0	IPS	STN	WF	014
262	0.0	IPS	STN	NN	014
263	0.0	IPS	STN	LM	014
