# Supplementary material for: Electrocorticography is superior to subthalamic local field potentials for movement decoding in Parkinson’s disease
Source: eLife. 2022 May 27;11:e75126. doi: 10.7554/eLife.75126 (PMC9142148; doi:10.7554/eLife.75126)
Supplement: Figure 3—source data 3. [file elife-75126-fig3-data3.csv]

	ch_	lat	loc	r2	sub
0	ECOG_RIGHT_5	IPS	ECOG_STN	0.49460333333333334	000
1	ECOG_RIGHT_5	CON	ECOG_STN	0.782851	000
2	ECOG_LEFT_27	CON	ECOG_STN	0.5361823333333333	001
3	ECOG_LEFT_27	IPS	ECOG_STN	0.36032966666666666	001
4	ECOG_RIGHT_27	IPS	ECOG_STN	0.18858833333333333	001
5	ECOG_RIGHT_27	CON	ECOG_STN	0.47084499999999996	001
6	ECOG_LEFT_7	CON	ECOG_STN	0.038502	004
7	ECOG_LEFT_7	IPS	ECOG_STN	0.2640346666666667	004
8	ECOG_RIGHT_7	IPS	ECOG_STN	0.4204853333333333	004
9	ECOG_RIGHT_7	CON	ECOG_STN	0.14218699999999998	004
10	ECOG_LEFT_7	CON	ECOG_STN	0.3338303333333333	005
11	ECOG_LEFT_7	IPS	ECOG_STN	0.07704833333333333	005
12	ECOG_RIGHT_7	IPS	ECOG_STN	0.0	005
13	ECOG_RIGHT_7	CON	ECOG_STN	0.09739666666666667	005
14	ECOG_LEFT_34	CON	ECOG_STN	0.039391666666666665	006
15	ECOG_LEFT_34	IPS	ECOG_STN	0.43618700000000005	006
16	ECOG_LEFT_35	CON	ECOG_STN	0.22806633333333334	006
17	ECOG_LEFT_35	IPS	ECOG_STN	0.174434	006
18	ECOG_LEFT_35	CON	ECOG_STN	0.308971	006
19	ECOG_LEFT_35	IPS	ECOG_STN	0.0	006
20	ECOG_RIGHT_35	IPS	ECOG_STN	0.030542666666666666	006
21	ECOG_RIGHT_35	CON	ECOG_STN	0.42262500000000003	006
22	ECOG_LEFT_5	CON	ECOG_STN	0.0	007
23	ECOG_LEFT_5	IPS	ECOG_STN	0.037101	007
24	ECOG_LEFT_5	CON	ECOG_STN	0.31921533333333335	008
25	ECOG_LEFT_5	IPS	ECOG_STN	0.003875333333333333	008
26	ECOG_LEFT_5	CON	ECOG_STN	0.0	009
27	ECOG_LEFT_5	IPS	ECOG_STN	0.0	009
28	ECOG_LEFT_5	CON	ECOG_STN	0.252162	010
29	ECOG_LEFT_5	IPS	ECOG_STN	0.02112	010
30	ECOG_RIGHT_5	IPS	ECOG_STN	0.0036263333333333334	010
31	ECOG_RIGHT_5	CON	ECOG_STN	0.08315666666666667	010
32	ECOG_LEFT_5	CON	ECOG_STN	0.09699133333333333	013
33	ECOG_LEFT_5	IPS	ECOG_STN	0.008117666666666667	013
34	ECOG_RIGHT_5	IPS	ECOG_STN	0.0	014
35	ECOG_RIGHT_5	CON	ECOG_STN	0.062399	014
36	ECOG_RIGHT_5	IPS	ECOG	0.5101456666666667	000
37	ECOG_RIGHT_5	CON	ECOG	0.7980646666666668	000
38	ECOG_LEFT_27	CON	ECOG	0.5385736666666666	001
39	ECOG_LEFT_27	IPS	ECOG	0.233974	001
40	ECOG_RIGHT_27	IPS	ECOG	0.17569866666666667	001
41	ECOG_RIGHT_27	CON	ECOG	0.45419633333333337	001
42	ECOG_LEFT_7	CON	ECOG	0.03149233333333334	004
43	ECOG_LEFT_7	IPS	ECOG	0.24844	004
44	ECOG_RIGHT_7	IPS	ECOG	0.3249283333333333	004
45	ECOG_RIGHT_7	CON	ECOG	0.12837233333333334	004
46	ECOG_LEFT_7	CON	ECOG	0.29179933333333335	005
47	ECOG_LEFT_7	IPS	ECOG	0.078298	005
48	ECOG_RIGHT_7	IPS	ECOG	0.0	005
49	ECOG_RIGHT_7	CON	ECOG	0.0	005
50	ECOG_LEFT_34	CON	ECOG	0.0	006
51	ECOG_LEFT_34	IPS	ECOG	0.3905596666666667	006
52	ECOG_LEFT_35	CON	ECOG	0.17959166666666668	006
53	ECOG_LEFT_35	IPS	ECOG	0.13747633333333334	006
54	ECOG_LEFT_35	CON	ECOG	0.2964443333333333	006
55	ECOG_LEFT_35	IPS	ECOG	0.0	006
56	ECOG_RIGHT_35	IPS	ECOG	0.019901	006
57	ECOG_RIGHT_35	CON	ECOG	0.42411400000000005	006
58	ECOG_LEFT_5	CON	ECOG	0.03211266666666667	007
59	ECOG_LEFT_5	IPS	ECOG	0.02556	007
60	ECOG_LEFT_5	CON	ECOG	0.339572	008
61	ECOG_LEFT_5	IPS	ECOG	0.01137	008
62	ECOG_LEFT_5	CON	ECOG	0.0	009
63	ECOG_LEFT_5	IPS	ECOG	0.0	009
64	ECOG_LEFT_5	CON	ECOG	0.24604333333333336	010
65	ECOG_LEFT_5	IPS	ECOG	0.004153666666666667	010
66	ECOG_RIGHT_5	IPS	ECOG	0.0	010
67	ECOG_RIGHT_5	CON	ECOG	0.106673	010
68	ECOG_LEFT_5	CON	ECOG	0.093044	013
69	ECOG_LEFT_5	IPS	ECOG	0.0	013
70	ECOG_RIGHT_5	IPS	ECOG	0.0008516666666666667	014
71	ECOG_RIGHT_5	CON	ECOG	0.07826999999999999	014
72	ECOG_RIGHT_5	IPS	STN	0.172378	000
73	ECOG_RIGHT_5	CON	STN	0.6638226666666667	000
74	ECOG_LEFT_27	CON	STN	0.08546733333333334	001
75	ECOG_LEFT_27	IPS	STN	0.07146633333333334	001
76	ECOG_RIGHT_27	IPS	STN	0.003998333333333334	001
77	ECOG_RIGHT_27	CON	STN	0.0013376666666666667	001
78	ECOG_LEFT_7	CON	STN	0.031142	004
79	ECOG_LEFT_7	IPS	STN	0.12253766666666666	004
80	ECOG_RIGHT_7	IPS	STN	0.22285966666666668	004
81	ECOG_RIGHT_7	CON	STN	0.020503666666666667	004
82	ECOG_LEFT_7	CON	STN	0.08934766666666667	005
83	ECOG_LEFT_7	IPS	STN	0.011366333333333332	005
84	ECOG_RIGHT_7	IPS	STN	0.0	005
85	ECOG_RIGHT_7	CON	STN	0.043517	005
86	ECOG_LEFT_34	CON	STN	0.0	006
87	ECOG_LEFT_34	IPS	STN	0.027244333333333332	006
88	ECOG_LEFT_35	CON	STN	0.05641366666666667	006
89	ECOG_LEFT_35	IPS	STN	0.0050420000000000005	006
90	ECOG_LEFT_35	CON	STN	0.0	006
91	ECOG_LEFT_35	IPS	STN	0.0	006
92	ECOG_RIGHT_35	IPS	STN	0.009528666666666666	006
93	ECOG_RIGHT_35	CON	STN	0.018156666666666668	006
94	ECOG_LEFT_5	CON	STN	0.0	007
95	ECOG_LEFT_5	IPS	STN	0.0	007
96	ECOG_LEFT_5	CON	STN	0.0	008
97	ECOG_LEFT_5	IPS	STN	0.0	008
98	ECOG_LEFT_5	CON	STN	0.0	009
99	ECOG_LEFT_5	IPS	STN	0.0	009
100	ECOG_LEFT_5	CON	STN	0.0	010
101	ECOG_LEFT_5	IPS	STN	0.0	010
102	ECOG_RIGHT_5	IPS	STN	0.0	010
103	ECOG_RIGHT_5	CON	STN	0.0	010
104	ECOG_LEFT_5	CON	STN	0.0	013
105	ECOG_LEFT_5	IPS	STN	0.0	013
106	ECOG_RIGHT_5	IPS	STN	0.0	014
107	ECOG_RIGHT_5	CON	STN	0.0	014
