# Supplementary material for: Electrocorticography is superior to subthalamic local field potentials for movement decoding in Parkinson’s disease
Source: eLife. 2022 May 27;11:e75126. doi: 10.7554/eLife.75126 (PMC9142148; doi:10.7554/eLife.75126)
Supplement: Figure 4—source data 1. [file elife-75126-fig4-data1.csv]

	var_max_ampltitude	UPDRS_total	r2_con_mean	r2_ips_mean	r2_con_best	r2_ips_best	r2_meanconips_mean	r2_meanconips_best
0	0.01476742267256622	28.0	0.6109680846666667	0.24288950388888889	0.71173448	0.418973615	0.4269287942777778	0.5653540475
1	0.004068202809956319	27.0	0.24178133427419354	0.09181873195161291	0.64427136	0.21977461	0.16680003311290323	0.43202298499999997
2	0.022701118981200634	33.0	0.02881349640909091	0.19340871872727272	0.163216507	0.400102894	0.11111110756818182	0.2816597005
3	0.021413724252065485	31.0	0.09597003327272727	0.0382773855	0.37205257	0.195019359	0.06712370938636364	0.2835359645
4	0.0319633995345306	32.0	0.1493668085714286	0.026807085271428572	0.365936348	0.115481387	0.08808694692142859	0.2407088675
5	0.029132553437525813	52.0	0.010548920111111111	0.002374458777777778	0.041649815	0.012180813	0.006461689444444444	0.026915314
6	0.01649496482904515	55.0	0.12026410688888887	0.004042988444444445	0.442235016	0.011046882	0.06215354766666666	0.22664094899999998
7	0.025227265040362042	50.0	0.01823647111111111	0.0015729864444444443	0.061539653	0.010650696	0.009904728777777778	0.0360951745
8	0.02378738347840654	62.0	0.04518139422222222	0.004262091777777778	0.392282085	0.044818689	0.024721742999999997	0.218550387
9	0.01962152315648885	48.0	0.04413807044444444	0.0004694892222222223	0.111205709	0.003040332	0.022303779833333332	0.0571230205
10	0.01984549687300029	31.0	0.020762150555555556	0.016489989222222223	0.062357808	0.050032228	0.018626069888888888	0.056195018
