# Supplementary material for: Electrocorticography is superior to subthalamic local field potentials for movement decoding in Parkinson’s disease
Source: eLife. 2022 May 27;11:e75126. doi: 10.7554/eLife.75126 (PMC9142148; doi:10.7554/eLife.75126)
Supplement: Figure 5—source data 1. [file elife-75126-fig5-data1.csv]

	sub	beta	loc	thr	time in burst 0 to 1s	time in burst -1 to 0s	r2_con	r2_ips
0	0	all_beta	ECOG	rest	0.09913793103448276	2.1666666666666665	0.71173448	0.418973615
1	0	all_beta	ECOG	whole segment	0.13505747126436782	2.6494252873563218	0.71173448	0.418973615
2	0	all_beta	STN	rest	0.09756097560975609	1.3414634146341464	0.71173448	0.418973615
3	0	all_beta	STN	whole segment	0.13008130081300814	1.7560975609756098	0.71173448	0.418973615
4	0	high_beta	ECOG	rest	0.44252873563218387	1.9770114942528736	0.71173448	0.418973615
5	0	high_beta	ECOG	whole segment	0.5474137931034483	2.3577586206896552	0.71173448	0.418973615
6	0	high_beta	STN	rest	0.5934959349593496	1.3658536585365855	0.71173448	0.418973615
7	0	high_beta	STN	whole segment	0.7642276422764228	1.6178861788617886	0.71173448	0.418973615
8	0	low_beta	ECOG	rest	0.10201149425287355	2.3232758620689657	0.71173448	0.418973615
9	0	low_beta	ECOG	whole segment	0.15086206896551724	2.745689655172414	0.71173448	0.418973615
10	0	low_beta	STN	rest	0.08943089430894309	1.4227642276422765	0.71173448	0.418973615
11	0	low_beta	STN	whole segment	0.12195121951219512	1.8536585365853657	0.71173448	0.418973615
12	1	all_beta	ECOG	rest	0.21772701675718917	1.9860499294766536	0.64427136	0.21977461
13	1	all_beta	ECOG	whole segment	0.3039260189044672	2.423790050945223	0.64427136	0.21977461
14	1	all_beta	STN	rest	0.5766868353502017	1.9344288595526218	0.64427136	0.21977461
15	1	all_beta	STN	whole segment	0.6744361936193619	2.3110331866519984	0.64427136	0.21977461
16	1	high_beta	ECOG	rest	0.3699363974148457	2.0457224169508654	0.64427136	0.21977461
17	1	high_beta	ECOG	whole segment	0.4791291682455476	2.4559156719717063	0.64427136	0.21977461
18	1	high_beta	STN	rest	0.7321919691969198	2.174527869453612	0.64427136	0.21977461
19	1	high_beta	STN	whole segment	0.8550146681334801	2.5072882288228824	0.64427136	0.21977461
20	1	low_beta	ECOG	rest	0.2673144025514715	2.128841943497116	0.64427136	0.21977461
21	1	low_beta	ECOG	whole segment	0.37635060102732515	2.5764737537366846	0.64427136	0.21977461
22	1	low_beta	STN	rest	0.6362302896956362	1.743995232856619	0.64427136	0.21977461
23	1	low_beta	STN	whole segment	0.7789466446644665	2.0875504217088374	0.64427136	0.21977461
24	4	all_beta	ECOG	rest	0.5698309312638581	2.6014828159645234	0.163216507	0.400102894
25	4	all_beta	ECOG	whole segment	0.8272865853658536	3.3480737250554324	0.163216507	0.400102894
26	4	all_beta	STN	rest	1.063982626127631	1.8309388573337788	0.163216507	0.400102894
27	4	all_beta	STN	whole segment	1.1914467089876377	1.9934569551174963	0.163216507	0.400102894
28	4	high_beta	ECOG	rest	0.6442211751662971	2.60774667405765	0.163216507	0.400102894
29	4	high_beta	ECOG	whole segment	0.8776746119733925	3.3491269401330377	0.163216507	0.400102894
30	4	high_beta	STN	rest	2.501475665441586	1.8656309165831384	0.163216507	0.400102894
31	4	high_beta	STN	whole segment	2.1671956788061033	1.7449326205590825	0.163216507	0.400102894
32	4	low_beta	ECOG	rest	0.6235171840354767	2.5939440133037692	0.163216507	0.400102894
33	4	low_beta	ECOG	whole segment	0.8858231707317074	3.273891352549889	0.163216507	0.400102894
34	4	low_beta	STN	rest	1.0105245573003676	1.8388461966811447	0.163216507	0.400102894
35	4	low_beta	STN	whole segment	1.1785555184318968	2.0807161153803317	0.163216507	0.400102894
36	5	all_beta	ECOG	rest	0.7390157645507403	1.8348431037583168	0.37205257	0.195019359
37	5	all_beta	ECOG	whole segment	0.8610898819157226	2.159009171012408	0.37205257	0.195019359
38	5	all_beta	STN	rest	0.4886363636363636	2.2386363636363638	0.37205257	0.195019359
39	5	all_beta	STN	whole segment	0.6174242424242425	2.643939393939394	0.37205257	0.195019359
40	5	high_beta	ECOG	rest	0.9644435952766289	1.9287560690523287	0.37205257	0.195019359
41	5	high_beta	ECOG	whole segment	1.0956512617634717	2.2191227596954985	0.37205257	0.195019359
42	5	high_beta	STN	rest	1.0984848484848484	2.4393939393939394	0.37205257	0.195019359
43	5	high_beta	STN	whole segment	1.2159090909090908	2.7386363636363633	0.37205257	0.195019359
44	5	low_beta	ECOG	rest	0.6756503626446083	1.9695011388838939	0.37205257	0.195019359
45	5	low_beta	ECOG	whole segment	0.7833535635077624	2.3065208595576334	0.37205257	0.195019359
46	5	low_beta	STN	rest	0.4583333333333333	2.4204545454545454	0.37205257	0.195019359
47	5	low_beta	STN	whole segment	0.587121212121212	2.803030303030303	0.37205257	0.195019359
48	6	all_beta	ECOG	rest	0.6041276427894215	2.2587972329840458	0.365936348	0.115481387
49	6	all_beta	ECOG	whole segment	0.761538648018289	2.723899603407898	0.365936348	0.115481387
50	6	all_beta	STN	rest	0.4506500825182143	2.5706235156784607	0.365936348	0.115481387
51	6	all_beta	STN	whole segment	0.6035905486454937	3.0515235680070845	0.365936348	0.115481387
52	6	high_beta	ECOG	rest	0.6723260017992543	2.094551597339077	0.365936348	0.115481387
53	6	high_beta	ECOG	whole segment	0.8384640037652499	2.5093899796485206	0.365936348	0.115481387
54	6	high_beta	STN	rest	0.5763192851104939	2.452863985831019	0.365936348	0.115481387
55	6	high_beta	STN	whole segment	0.76007326007326	2.8582296824055065	0.365936348	0.115481387
56	6	low_beta	ECOG	rest	0.7091771422102434	2.4103837225703657	0.365936348	0.115481387
57	6	low_beta	ECOG	whole segment	0.8827908949319064	2.8808234486009354	0.365936348	0.115481387
58	6	low_beta	STN	rest	0.6167934629473092	2.459405063800668	0.365936348	0.115481387
59	6	low_beta	STN	whole segment	0.8246991104133962	2.960310751519543	0.365936348	0.115481387
60	7	all_beta	ECOG	rest	0.7616033755274262	2.3164556962025316	0.041649815	0.012180813
61	7	all_beta	ECOG	whole segment	0.8966244725738397	2.6434599156118144	0.041649815	0.012180813
62	7	all_beta	STN	rest	1.5358649789029535	2.742616033755274	0.041649815	0.012180813
63	7	all_beta	STN	whole segment	1.7130801687763713	2.911392405063291	0.041649815	0.012180813
64	7	high_beta	ECOG	rest	0.4345991561181435	2.339662447257384	0.041649815	0.012180813
65	7	high_beta	ECOG	whole segment	0.5654008438818565	2.8312236286919834	0.041649815	0.012180813
66	7	high_beta	STN	rest	1.5780590717299579	2.8945147679324896	0.041649815	0.012180813
67	7	high_beta	STN	whole segment	1.7130801687763713	3.126582278481013	0.041649815	0.012180813
68	7	low_beta	ECOG	rest	1.1687763713080168	2.1350210970464136	0.041649815	0.012180813
69	7	low_beta	ECOG	whole segment	1.2911392405063291	2.3354430379746836	0.041649815	0.012180813
70	7	low_beta	STN	rest	1.9324894514767932	2.7299578059071727	0.041649815	0.012180813
71	7	low_beta	STN	whole segment	2.021097046413502	2.8481012658227844	0.041649815	0.012180813
72	8	all_beta	ECOG	rest	0.5878378378378378	2.0495495495495497	0.442235016	0.011046882
73	8	all_beta	ECOG	whole segment	0.6869369369369368	2.2804054054054053	0.442235016	0.011046882
74	8	all_beta	STN	rest	0.9620253164556961	1.881856540084388	0.442235016	0.011046882
75	8	all_beta	STN	whole segment	1.0126582278481013	2.021097046413502	0.442235016	0.011046882
76	8	high_beta	ECOG	rest	0.7826576576576576	2.220720720720721	0.442235016	0.011046882
77	8	high_beta	ECOG	whole segment	0.8333333333333334	2.4121621621621623	0.442235016	0.011046882
78	8	high_beta	STN	rest	1.4092827004219408	2.126582278481013	0.442235016	0.011046882
79	8	high_beta	STN	whole segment	1.4261603375527425	2.1772151898734178	0.442235016	0.011046882
80	8	low_beta	ECOG	rest	0.5675675675675675	1.936936936936937	0.442235016	0.011046882
81	8	low_beta	ECOG	whole segment	0.6779279279279279	2.19481981981982	0.442235016	0.011046882
82	8	low_beta	STN	rest	0.9662447257383966	1.8607594936708862	0.442235016	0.011046882
83	8	low_beta	STN	whole segment	1.0759493670886078	2.037974683544304	0.442235016	0.011046882
84	9	all_beta	ECOG	rest	0.13681592039800997	1.3407960199004976	0.061539653	0.010650696
85	9	all_beta	ECOG	whole segment	0.16666666666666666	1.6840796019900497	0.061539653	0.010650696
86	9	all_beta	STN	rest	4.151515151515151	2.6363636363636362	0.061539653	0.010650696
87	9	all_beta	STN	whole segment	4.0606060606060606	2.606060606060606	0.061539653	0.010650696
88	9	high_beta	ECOG	rest	0.09701492537313433	1.3768656716417909	0.061539653	0.010650696
89	9	high_beta	ECOG	whole segment	0.1517412935323383	1.7014925373134329	0.061539653	0.010650696
90	9	high_beta	STN	rest	3.303030303030303	2.4242424242424243	0.061539653	0.010650696
91	9	high_beta	STN	whole segment	3.121212121212121	2.1515151515151514	0.061539653	0.010650696
92	9	low_beta	ECOG	rest	0.16293532338308456	1.4092039800995024	0.061539653	0.010650696
93	9	low_beta	ECOG	whole segment	0.23880597014925373	1.7276119402985077	0.061539653	0.010650696
94	9	low_beta	STN	rest	4.121212121212121	2.696969696969697	0.061539653	0.010650696
95	9	low_beta	STN	whole segment	3.96969696969697	2.6363636363636362	0.061539653	0.010650696
96	10	all_beta	ECOG	rest	2.987559080349275	2.8436133141071855	0.392282085	0.044818689
97	10	all_beta	ECOG	whole segment	2.9089181286549706	2.7833914123207566	0.392282085	0.044818689
98	10	all_beta	STN	rest	1.599755170078658	2.6115017971558054	0.392282085	0.044818689
99	10	all_beta	STN	whole segment	1.736651560139605	2.9071469500442775	0.392282085	0.044818689
100	10	high_beta	ECOG	rest	2.4617299527357206	2.7272510614435634	0.392282085	0.044818689
101	10	high_beta	ECOG	whole segment	2.484887446927822	2.8027998077385248	0.392282085	0.044818689
102	10	high_beta	STN	rest	1.3541959681200186	2.659061311663281	0.392282085	0.044818689
103	10	high_beta	STN	whole segment	1.5244829921341878	2.9792936396311926	0.392282085	0.044818689
104	10	low_beta	ECOG	rest	3.2241929023471925	2.8410017623968593	0.392282085	0.044818689
105	10	low_beta	ECOG	whole segment	3.044921092686053	2.7399863814788112	0.392282085	0.044818689
106	10	low_beta	STN	rest	2.498254935667031	2.4693702140959526	0.392282085	0.044818689
107	10	low_beta	STN	whole segment	2.522685836328593	2.4956503620357346	0.392282085	0.044818689
108	13	all_beta	ECOG	rest	1.0130718954248366	1.5539215686274508	0.111205709	0.003040332
109	13	all_beta	ECOG	whole segment	1.173202614379085	1.826797385620915	0.111205709	0.003040332
110	13	all_beta	STN	rest	1.601449275362319	2.101449275362319	0.111205709	0.003040332
111	13	all_beta	STN	whole segment	1.6594202898550723	2.181159420289855	0.111205709	0.003040332
112	13	high_beta	ECOG	rest	1.3578431372549018	2.2663398692810457	0.111205709	0.003040332
113	13	high_beta	ECOG	whole segment	1.5245098039215685	2.549019607843137	0.111205709	0.003040332
114	13	high_beta	STN	rest	1.9130434782608694	2.0869565217391304	0.111205709	0.003040332
115	13	high_beta	STN	whole segment	1.898550724637681	2.0579710144927534	0.111205709	0.003040332
116	13	low_beta	ECOG	rest	0.9934640522875817	1.5245098039215685	0.111205709	0.003040332
117	13	low_beta	ECOG	whole segment	1.1274509803921569	1.8284313725490196	0.111205709	0.003040332
118	13	low_beta	STN	rest	1.434782608695652	2.6884057971014492	0.111205709	0.003040332
119	13	low_beta	STN	whole segment	1.5	2.8913043478260874	0.111205709	0.003040332
120	14	all_beta	ECOG	rest	0.5309734513274337	1.87905604719764	0.062357808	0.050032228
121	14	all_beta	ECOG	whole segment	0.7507374631268436	2.4926253687315634	0.062357808	0.050032228
122	14	all_beta	STN	rest	2.4420289855072466	2.4855072463768115	0.062357808	0.050032228
123	14	all_beta	STN	whole segment	2.5869565217391304	2.528985507246377	0.062357808	0.050032228
124	14	high_beta	ECOG	rest	0.6268436578171092	1.96165191740413	0.062357808	0.050032228
125	14	high_beta	ECOG	whole segment	0.8008849557522124	2.644542772861357	0.062357808	0.050032228
126	14	high_beta	STN	rest	2.2753623188405796	2.7753623188405796	0.062357808	0.050032228
127	14	high_beta	STN	whole segment	2.434782608695652	2.971014492753623	0.062357808	0.050032228
128	14	low_beta	ECOG	rest	0.7861356932153392	2.03834808259587	0.062357808	0.050032228
129	14	low_beta	ECOG	whole segment	1.028023598820059	2.471976401179941	0.062357808	0.050032228
130	14	low_beta	STN	rest	2.717391304347826	2.3550724637681157	0.062357808	0.050032228
131	14	low_beta	STN	whole segment	2.4927536231884058	2.1884057971014492	0.062357808	0.050032228
